# Supplementary material
Source: PubMed Central journal article supplement (PMC2635764)
Supplement: 0812591106_0812591106SI.pdf [file 0812591106_0812591106SI.pdf]

# Supporting Information

Jazdzewski et al. 10.1073/pnas.0812591106

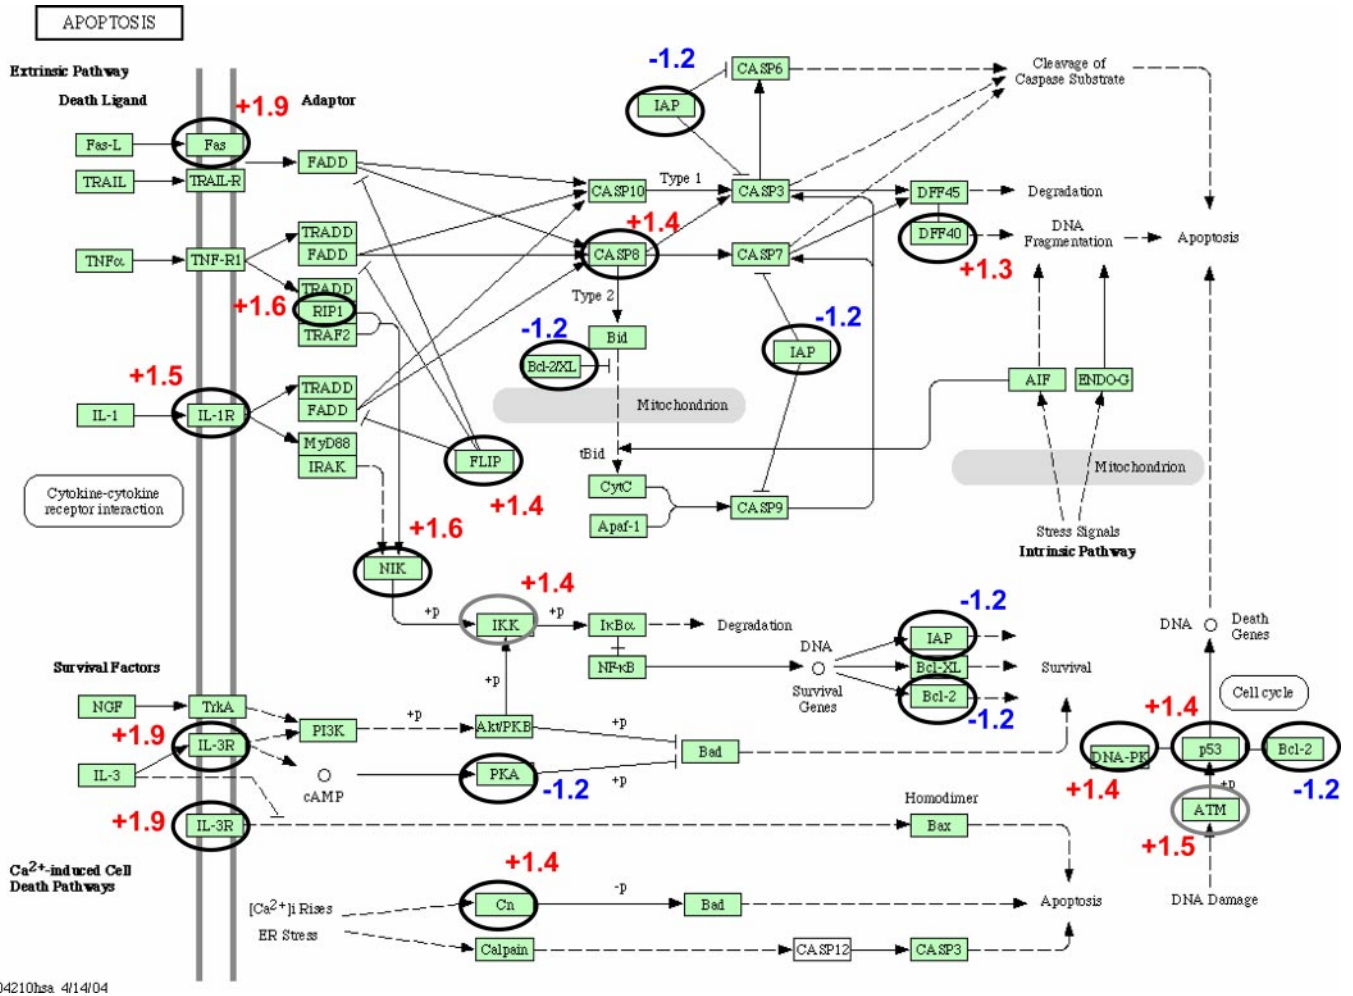

Fig. S1. Signaling pathway of apoptosis. Genes deregulated in GC heterozygotes compared with GG homozygotes in PTC tumors are circled with a fold change shown nearby.  $P$  value  $< 0.05$  for all genes except ATM ( $p = 0.06$ ). Source of diagram, <http://www.genome.ad.jp/kegg>.

## Other Supporting Information Files

- [Table S1](#)
- [Table S2](#)
- [Table S3](#)
- [Table S4](#)
