# Supplementary material
Source: PubMed Central journal article supplement (PMC2635764)
Supplement: 0812591106_ST1_PDF.pdf [file 0812591106_ST1_PDF.pdf]

**Table S1. Target genes of more than one mature miR (overlapping) predicted by TargetRank software.**

| GeneName | Gene/Isoform Description                          | Refseq ID    | miR-146a | miR-146a*G | miR-146a*C |
|----------|---------------------------------------------------|--------------|----------|------------|------------|
| NTRK2    | neurotrophic tyrosine kinase - receptor - type 2  | NM_001007097 | yes      | yes        | yes        |
| PAPPA    | pregnancy-associated plasma protein A             | NM_002581    | yes      | yes        |            |
| PGAP1    | GPI deacylase                                     | NM_024989    | yes      | yes        |            |
| PTAR1    | protein prenyltransferase alpha subunit repeat    | NM_001099666 | yes      | yes        |            |
| RGS5     | regulator of G-protein signalling 5               | NM_003617    | yes      | yes        |            |
| DTNA     | dystrobrevin alpha isoform 2                      | NM_032975    | yes      |            | yes        |
| FLJ20309 | hypothetical protein LOC54891                     | NM_017759    | yes      |            | yes        |
| LRRC15   | leucine rich repeat containing 15                 | NM_130830    | yes      |            | yes        |
| MARCH6   | membrane-associated ring finger (C3HC4) 6         | NM_005885    | yes      |            | yes        |
| NFAT5    | nuclear factor of activated T-cells 5 isoform c   | NM_006599    | yes      |            | yes        |
| SLC38A1  | amino acid transporter system A1                  | NM_030674    | yes      |            | yes        |
| SORT1    | sortilin 1 preproprotein                          | NM_002959    | yes      |            | yes        |
| TRDMT1   | tRNA aspartic acid methyltransferase 1 isoform    | NM_004412    | yes      |            | yes        |
| ZHX3     | zinc fingers and homeoboxes 3                     | NM_015035    | yes      |            | yes        |
| ZNF257   | zinc finger protein 257                           | NM_033468    | yes      |            | yes        |
| GABRA4   | gamma-aminobutyric acid A receptor - alpha 4      | NM_000809    |          | yes        | yes        |
| KLF12    | Kruppel-like factor 12                            | NM_007249    |          | yes        | yes        |
| ENTPD1   | ectonucleoside triphosphate diphosphohydrolase 1  | NM_001098175 |          | yes        | yes        |
| PLCXD3   | phosphatidylinositol-specific phospholipase C - X | NM_001005473 |          | yes        | yes        |
| SLC1A2   | excitatory amino acid transporter 2               | NM_004171    |          | yes        | yes        |
| ZNF592   | zinc finger protein 592                           | NM_014630    |          | yes        | yes        |
| XPO4     | exportin 4                                        | NM_022459    |          | yes        | yes        |
| KIAA1199 | KIAA1199                                          | NM_018689    |          | yes        | yes        |
| KIAA1909 | hypothetical protein LOC153478                    | NM_052909    |          | yes        | yes        |
| PCDH19   | protocadherin 19                                  | NM_020766    |          | yes        | yes        |
| ARHGAP26 | GTPase regulator associated with the focal        | NM_015071    |          | yes        | yes        |
