# Supplementary material
Source: PubMed Central journal article supplement (PMC2635764)
Supplement: 0812591106_ST2_PDF.pdf [file 0812591106_ST2_PDF.pdf]

**Table S2. Target genes of miR-146a and miR-146a\*G and miR-146a\*C predicted by TargetRank software**

**Target genes predicted for miR-146a**

| <b>microRNA</b> | <b>Rank</b> | <b>GeneName</b> | <b>Gene/Isoform Description</b>                    | <b>Refseq ID</b> | <b>TargetRank Score</b> | <b>Seed matches</b> |
|-----------------|-------------|-----------------|----------------------------------------------------|------------------|-------------------------|---------------------|
| miR-146a        | 1           | SFRS6           | arginine/serine-rich splicing factor 6             | NM_006275        | 0,74                    | 3                   |
| miR-146a        | 2           | FLJ44894        | similar to zinc finger protein 91                  | NM_001039884     | 0,72                    | 3                   |
| miR-146a        | 3           | PHF20L1         | PHD finger protein 20-like 1 isoform 1             | NM_016018        | 0,70                    | 4                   |
| miR-146a        | 4           | PTAR1           | protein prenyltransferase alpha subunit repeat     | NM_001099666     | 0,69                    | 3                   |
| miR-146a        | 5           | TRDMT1          | tRNA aspartic acid methyltransferase 1 isoform     | NM_004412        | 0,63                    | 5                   |
| miR-146a        | 6           | TNRC6A          | trinucleotide repeat containing 6A                 | NM_014494        | 0,63                    | 4                   |
| miR-146a        | 7           | TRAF6           | TNF receptor-associated factor 6                   | NM_145803        | 0,62                    | 3                   |
| miR-146a        | 8           | DTNA            | dystrobrevin alpha isoform 2                       | NM_032975        | 0,58                    | 3                   |
| miR-146a        | 9           | ITCH            | itchy homolog E3 ubiquitin protein ligase          | NM_031483        | 0,57                    | 4                   |
| miR-146a        | 10          | SLC38A1         | amino acid transporter system A1                   | NM_030674        | 0,56                    | 5                   |
| miR-146a        | 11          | NFAT5           | nuclear factor of activated T-cells 5 isoform c    | NM_006599        | 0,55                    | 5                   |
| miR-146a        | 12          | C2orf37         | hypothetical protein LOC80067                      | NM_025000        | 0,53                    | 4                   |
| miR-146a        | 13          | NOVA1           | neuro-oncological ventral antigen 1 isoform 1      | NM_002515        | 0,53                    | 4                   |
| miR-146a        | 14          | FLJ20309        | hypothetical protein LOC54891                      | NM_017759        | 0,52                    | 5                   |
| miR-146a        | 15          | ZNF253          | zinc finger protein 253                            | NM_021047        | 0,51                    | 2                   |
| miR-146a        | 16          | PRKCE           | protein kinase C - epsilon                         | NM_005400        | 0,50                    | 4                   |
| miR-146a        | 17          | ZC3H12B         | zinc finger CCCH-type containing 12B               | NM_001010888     | 0,49                    | 2                   |
| miR-146a        | 18          | ZNF257          | zinc finger protein 257                            | NM_033468        | 0,48                    | 2                   |
| miR-146a        | 19          | MS4A1           | membrane-spanning 4-domains - subfamily A - member | NM_021950        | 0,48                    | 2                   |
| miR-146a        | 19          | PHKB            | phosphorylase kinase - beta isoform a              | NM_000293        | 0,48                    | 2                   |
| miR-146a        | 21          | MED1            | mediator complex subunit 1                         | NM_004774        | 0,47                    | 3                   |
| miR-146a        | 22          | CCDC6           | coiled-coil domain containing 6                    | NM_005436        | 0,47                    | 3                   |
| miR-146a        | 23          | KIAA0152        | hypothetical protein LOC9761                       | NM_014730        | 0,47                    | 7                   |
| miR-146a        | 24          | NOTCH2          | notch 2 preproprotein                              | NM_024408        | 0,47                    | 4                   |

|          |    |          |                                                   |              |      |   |
|----------|----|----------|---------------------------------------------------|--------------|------|---|
| miR-146a | 25 | ARF6     | ADP-ribosylation factor 6                         | NM_001663    | 0,46 | 2 |
| miR-146a | 26 | ZHX3     | zinc fingers and homeoboxes 3                     | NM_015035    | 0,46 | 5 |
| miR-146a | 27 | ZNF506   | zinc finger protein 506                           | NM_001099269 | 0,46 | 2 |
| miR-146a | 28 | MOBK1A   | MOB1 - Mps One Binder kinase activator-like 1A    | NM_173468    | 0,45 | 4 |
| miR-146a | 29 | ZBTB2    | zinc finger and BTB domain containing 2           | NM_020861    | 0,45 | 3 |
| miR-146a | 29 | ST7L     | suppression of tumorigenicity 7-like isoform 1    | NM_017744    | 0,45 | 3 |
| miR-146a | 29 | GOSR1    | golgi SNAP receptor complex member 1 isoform 1    | NM_004871    | 0,45 | 2 |
| miR-146a | 32 | MARCH6   | membrane-associated ring finger (C3HC4) 6         | NM_005885    | 0,45 | 3 |
| miR-146a | 32 | FUT9     | fucosyltransferase 9 (alpha (1 -3))               | NM_006581    | 0,45 | 4 |
| miR-146a | 34 | SORT1    | sortilin 1 preproprotein                          | NM_002959    | 0,45 | 3 |
| miR-146a | 35 | ZNRF3    | zinc and ring finger 3                            | NM_032173    | 0,44 | 4 |
| miR-146a | 36 | ZNF117   | zinc finger protein 117                           | NM_015852    | 0,44 | 2 |
| miR-146a | 37 | ZNF148   | zinc finger protein 148 (pHZ-52)                  | NM_021964    | 0,43 | 2 |
| miR-146a | 38 | WDFY3    | WD repeat and FYVE domain containing 3 isoform    | NM_178583    | 0,42 | 2 |
| miR-146a | 39 | MYO5A    | myosin VA (heavy polypeptide 12 - myosin)         | NM_000259    | 0,42 | 3 |
| miR-146a | 40 | MMP16    | matrix metalloproteinase 16 isoform 1             | NM_005941    | 0,42 | 3 |
| miR-146a | 41 | RASGRP1  | RAS guanyl releasing protein 1                    | NM_005739    | 0,42 | 2 |
| miR-146a | 42 | IER5L    | immediate early response 5-like                   | NM_203434    | 0,42 | 3 |
| miR-146a | 43 | HIF3A    | hypoxia-inducible factor-3 alpha isoform b        | NM_022462    | 0,42 | 4 |
| miR-146a | 44 | IRAK1    | interleukin-1 receptor-associated kinase 1        | NM_001569    | 0,41 | 2 |
| miR-146a | 45 | SORCS1   | SORCS receptor 1 isoform a                        | NM_052918    | 0,41 | 4 |
| miR-146a | 45 | SORCS1   | SORCS receptor 1 isoform b                        | NM_001013031 | 0,41 | 4 |
| miR-146a | 47 | NTRK2    | neurotrophic tyrosine kinase - receptor - type 2  | NM_001007097 | 0,41 | 3 |
| miR-146a | 48 | FLJ45557 | hypothetical protein LOC642938                    | NM_001039762 | 0,40 | 2 |
| miR-146a | 49 | PAPPA    | pregnancy-associated plasma protein A             | NM_002581    | 0,40 | 4 |
| miR-146a | 49 | PGAP1    | GPI deacylase                                     | NM_024989    | 0,40 | 2 |
| miR-146a | 51 | DLGAP2   | discs large-associated protein 2                  | NM_004745    | 0,40 | 5 |
| miR-146a | 52 | RGS5     | regulator of G-protein signalling 5               | NM_003617    | 0,40 | 4 |
| miR-146a | 53 | SYNPO2   | synaptopodin 2                                    | NM_133477    | 0,40 | 4 |
| miR-146a | 54 | ADAMTS18 | ADAM metalloproteinase with thrombospondin type 1 | NM_199355    | 0,39 | 2 |
| miR-146a | 55 | ERBB4    | v-erb-a erythroblastic leukemia viral oncogene    | NM_005235    | 0,39 | 3 |

|          |    |              |                                                 |              |      |   |
|----------|----|--------------|-------------------------------------------------|--------------|------|---|
| miR-146a | 56 | GALNT10      | GalNAc transferase 10 isoform a                 | NM_198321    | 0,39 | 3 |
| miR-146a | 57 | PDGFRA       | platelet-derived growth factor receptor alpha   | NM_006206    | 0,38 | 2 |
| miR-146a | 58 | ZNF138       | zinc finger protein 138                         | NM_006524    | 0,38 | 2 |
| miR-146a | 59 | PPP2R1B      | beta isoform of regulatory subunit A - protein  | NM_002716    | 0,38 | 5 |
| miR-146a | 60 | FBXL3        | F-box and leucine-rich repeat protein 3         | NM_012158    | 0,38 | 2 |
| miR-146a | 60 | CXorf1       | hypothetical protein LOC9142                    | NM_004709    | 0,38 | 2 |
| miR-146a | 62 | CREBL2       | cAMP responsive element binding protein-like 2  | NM_001310    | 0,38 | 2 |
| miR-146a | 63 | IGSF1        | immunoglobulin superfamily - member 1 isoform 2 | NM_205833    | 0,38 | 2 |
| miR-146a | 63 | FAM110B      | hypothetical protein LOC90362                   | NM_147189    | 0,38 | 2 |
| miR-146a | 65 | LRRC15       | leucine rich repeat containing 15               | NM_130830    | 0,37 | 3 |
| miR-146a | 66 | GALNAC4S-6ST | B cell RAG associated protein                   | NM_015892    | 0,36 | 3 |
| miR-146a | 67 | SYT14        | synaptotagmin XIV                               | NM_153262    | 0,36 | 4 |
| miR-146a | 67 | FLJ10781     | hypothetical protein LOC55228                   | NM_018215    | 0,36 | 3 |
| miR-146a | 69 | GRSF1        | G-rich RNA sequence binding factor 1 isoform 1  | NM_002092    | 0,36 | 3 |
| miR-146a | 70 | PARD6G       | PAR-6 gamma protein                             | NM_032510    | 0,36 | 2 |
| miR-146a | 71 | FAM62B       | family with sequence similarity 62 (C2 domain   | NM_020728    | 0,36 | 2 |
| miR-146a | 72 | PPM1H        | protein phosphatase 1H (PP2C domain containing) | NM_020700    | 0,35 | 4 |
| miR-146a | 73 | AFF2         | fragile X mental retardation 2                  | NM_002025    | 0,35 | 5 |
| miR-146a | 73 | NUS1         | nuclear undecaprenyl pyrophosphate synthase 1   | NM_138459    | 0,35 | 3 |
| miR-146a | 75 | COL9A1       | alpha 1 type IX collagen isoform 1 precursor    | NM_001851    | 0,35 | 2 |
| miR-146a | 75 | UBE2G1       | ubiquitin-conjugating enzyme E2G 1              | NM_003342    | 0,35 | 2 |
| miR-146a | 75 | LOC339745    | hypothetical protein LOC339745                  | NM_001001664 | 0,35 | 2 |
| miR-146a | 75 | GRID1        | glutamate receptor - ionotropic - delta 1       | NM_017551    | 0,35 | 2 |

**Target genes predicted for miR-146a\*G**

| microRNA   | Rank | GeneName | Gene/Isoform Description                     | Refseq ID | TargetRank Score | Seed matches |
|------------|------|----------|----------------------------------------------|-----------|------------------|--------------|
| miR-146a*G | 1    | GABRA4   | gamma-aminobutyric acid A receptor - alpha 4 | NM_000809 | 0,89             | 8            |
| miR-146a*G | 2    | EPM2AIP1 | EPM2A interacting protein 1                  | NM_014805 | 0,75             | 4            |
| miR-146a*G | 3    | PSD3     | ADP-ribosylation factor guanine nucleotide   | NM_015310 | 0,74             | 8            |

|            |    |          |                                                                                                         |              |      |   |
|------------|----|----------|---------------------------------------------------------------------------------------------------------|--------------|------|---|
| miR-146a*G | 4  | PCDH7    | protocadherin 7 isoform c precursor                                                                     | NM_032457    | 0,73 | 3 |
| miR-146a*G | 5  | RNF38    | ring finger protein 38 isoform 2                                                                        | NM_194328    | 0,73 | 5 |
| miR-146a*G | 6  | HSPA12A  | heat shock 70kDa protein 12A                                                                            | NM_025015    | 0,66 | 7 |
| miR-146a*G | 7  | KLF12    | Kruppel-like factor 12                                                                                  | NM_007249    | 0,65 | 4 |
| miR-146a*G | 8  | ESR1     | estrogen receptor 1                                                                                     | NM_000125    | 0,65 | 5 |
| miR-146a*G | 9  | CDC2L6   | cell division cycle 2-like 6 (CDK8-like)                                                                | NM_015076    | 0,65 | 3 |
| miR-146a*G | 10 | CTSC     | cathepsin C isoform b precursor                                                                         | NM_148170    | 0,62 | 4 |
| miR-146a*G | 11 | KLHL3    | kelch-like 3                                                                                            | NM_017415    | 0,61 | 4 |
| miR-146a*G | 12 | ENTPD1   | ectonucleoside triphosphate diphosphohydrolase 1                                                        | NM_001098175 | 0,61 | 9 |
| miR-146a*G | 13 | PTGER3   | prostaglandin E receptor 3 - subtype EP3 isoform                                                        | NM_198715    | 0,60 | 5 |
| miR-146a*G | 14 | PLCXD3   | phosphatidylinositol-specific phospholipase C - X<br>membrane component chromosome 11 surface<br>marker | NM_001005473 | 0,60 | 4 |
| miR-146a*G | 15 | CAPRIN1  | marker                                                                                                  | NM_005898    | 0,59 | 4 |
| miR-146a*G | 16 | RGS5     | regulator of G-protein signalling 5                                                                     | NM_003617    | 0,57 | 4 |
| miR-146a*G | 17 | C6orf35  | hypothetical protein LOC729515                                                                          | NM_018452    | 0,57 | 4 |
| miR-146a*G | 18 | SLC1A2   | excitatory amino acid transporter 2                                                                     | NM_004171    | 0,57 | 4 |
| miR-146a*G | 19 | RUNX1    | runt-related transcription factor 1 isoform a                                                           | NM_001754    | 0,56 | 2 |
| miR-146a*G | 20 | ZNF592   | zinc finger protein 592                                                                                 | NM_014630    | 0,56 | 6 |
| miR-146a*G | 21 | KIAA0256 | hypothetical protein LOC9728                                                                            | NM_014701    | 0,55 | 3 |
| miR-146a*G | 22 | CCND2    | cyclin D2                                                                                               | NM_001759    | 0,54 | 3 |
| miR-146a*G | 23 | XPO4     | exportin 4                                                                                              | NM_022459    | 0,54 | 4 |
| miR-146a*G | 24 | ELTD1    | EGF - latrophilin and seven transmembrane domain                                                        | NM_022159    | 0,54 | 3 |
| miR-146a*G | 25 | KSR2     | kinase suppressor of ras 2                                                                              | NM_173598    | 0,53 | 6 |
| miR-146a*G | 26 | BMPR2    | bone morphogenetic protein receptor type II                                                             | NM_001204    | 0,51 | 3 |
| miR-146a*G | 27 | CHML     | choroideremia-like Rab escort protein 2                                                                 | NM_001821    | 0,51 | 4 |
| miR-146a*G | 28 | BBS9     | parathyroid hormone-responsive B1 isoform 2                                                             | NM_198428    | 0,51 | 2 |
| miR-146a*G | 28 | RTN4     | reticulon 4 isoform E                                                                                   | NM_207521    | 0,51 | 2 |
| miR-146a*G | 30 | SLC23A2  | solute carrier family 23 (nucleobase                                                                    | NM_005116    | 0,50 | 5 |
| miR-146a*G | 31 | PHC3     | polyhomeotic like 3                                                                                     | NM_024947    | 0,50 | 5 |
| miR-146a*G | 32 | NTRK2    | neurotrophic tyrosine kinase - receptor - type 2                                                        | NM_001007097 | 0,50 | 3 |
| miR-146a*G | 33 | TOP1     | DNA topoisomerase I                                                                                     | NM_003286    | 0,49 | 2 |
| miR-146a*G | 34 | KIAA1199 | KIAA1199                                                                                                | NM_018689    | 0,49 | 5 |

|            |    |          |                                                   |              |      |    |
|------------|----|----------|---------------------------------------------------|--------------|------|----|
| miR-146a*G | 35 | CRX      | cone-rod homeobox protein                         | NM_000554    | 0,49 | 4  |
| miR-146a*G | 35 | SOX11    | SRY-box 11                                        | NM_003108    | 0,49 | 2  |
| miR-146a*G | 37 | WDR69    | WD repeat domain 69                               | NM_178821    | 0,48 | 2  |
| miR-146a*G | 38 | PARP15   | poly (ADP-ribose) polymerase family - member 15   | NM_152615    | 0,48 | 4  |
| miR-146a*G | 39 | TPPP     | tubulin polymerization promoting protein          | NM_007030    | 0,48 | 15 |
| miR-146a*G | 40 | DCP1A    | DCP1 decapping enzyme homolog A                   | NM_018403    | 0,48 | 4  |
| miR-146a*G | 41 | CD2AP    | CD2-associated protein                            | NM_012120    | 0,48 | 2  |
| miR-146a*G | 42 | EIF5     | eukaryotic translation initiation factor 5        | NM_183004    | 0,48 | 2  |
| miR-146a*G | 43 | BVES     | blood vessel epicardial substance isoform 4       | NM_007073    | 0,47 | 6  |
| miR-146a*G | 44 | STARD3NL | MLN64 N-terminal homolog                          | NM_032016    | 0,47 | 3  |
| miR-146a*G | 45 | YTHDC1   | splicing factor YT521-B isoform 2                 | NM_133370    | 0,47 | 3  |
| miR-146a*G | 45 | GLRA3    | glycine receptor - alpha 3 isoform b              | NM_001042543 | 0,47 | 2  |
| miR-146a*G | 47 | AQP4     | aquaporin 4 isoform a                             | NM_001650    | 0,46 | 3  |
| miR-146a*G | 48 | ADD3     | adducin 3 (gamma) isoform b                       | NM_019903    | 0,46 | 3  |
| miR-146a*G | 49 | FBXO3    | F-box only protein 3 isoform 1                    | NM_012175    | 0,45 | 2  |
| miR-146a*G | 50 | SLC2A12  | solute carrier family 2 (facilitated glucose      | NM_145176    | 0,45 | 3  |
| miR-146a*G | 51 | ZMAT4    | zinc finger - matrin type 4                       | NM_024645    | 0,45 | 2  |
| miR-146a*G | 52 | GOLGA8E  | golgi autoantigen - golgin subfamily a - 8E       | NM_001012423 | 0,45 | 3  |
| miR-146a*G | 53 | KIAA1909 | hypothetical protein LOC153478                    | NM_052909    | 0,45 | 7  |
| miR-146a*G | 54 | STXBP3   | syntaxin binding protein 3                        | NM_007269    | 0,45 | 2  |
| miR-146a*G | 54 | ZC3H12C  | zinc finger CCCH-type containing 12C              | NM_033390    | 0,45 | 2  |
| miR-146a*G | 56 | NR5A2    | nuclear receptor subfamily 5 - group A - member 2 | NM_003822    | 0,45 | 5  |
| miR-146a*G | 57 | TRIM67   | tripartite motif-containing 67                    | NM_001004342 | 0,44 | 5  |
| miR-146a*G | 58 | DIAPH2   | diaphanous 2 isoform 156                          | NM_006729    | 0,44 | 5  |
| miR-146a*G | 59 | ZBTB38   | zinc finger and BTB domain containing 38          | NM_001080412 | 0,43 | 3  |
| miR-146a*G | 60 | NLGN1    | neuroligin 1                                      | NM_014932    | 0,43 | 2  |
| miR-146a*G | 61 | PCDH19   | protocadherin 19                                  | NM_020766    | 0,43 | 3  |
| miR-146a*G | 62 | USP45    | ubiquitin specific peptidase 45                   | NM_001080481 | 0,43 | 3  |
| miR-146a*G | 63 | TPD52    | tumor protein D52 isoform 2                       | NM_001025253 | 0,43 | 2  |

|            |    |          |                                                   |              |      |   |
|------------|----|----------|---------------------------------------------------|--------------|------|---|
| miR-146a*G | 64 | KIAA1462 | hypothetical protein LOC57608                     | NM_020848    | 0,42 | 3 |
| miR-146a*G | 65 | GLIS3    | GLIS family zinc finger 3 isoform b               | NM_152629    | 0,42 | 7 |
| miR-146a*G | 66 | C9orf123 | hypothetical protein LOC90871                     | NM_033428    | 0,42 | 4 |
| miR-146a*G | 67 | PRKG1    | protein kinase - cGMP-dependent - type I isoform  | NM_006258    | 0,42 | 2 |
| miR-146a*G | 67 | DGKB     | diacylglycerol kinase - beta isoform 1            | NM_004080    | 0,42 | 2 |
| miR-146a*G | 67 | PTPRG    | protein tyrosine phosphatase - receptor type - G  | NM_002841    | 0,42 | 2 |
| miR-146a*G | 67 | LIFR     | leukemia inhibitory factor receptor precursor     | NM_002310    | 0,42 | 2 |
| miR-146a*G | 71 | MAGI2    | membrane associated guanylate kinase - WW and PDZ | NM_012301    | 0,42 | 3 |
| miR-146a*G | 72 | IGF2BP2  | insulin-like growth factor 2 mRNA binding         | NM_006548    | 0,42 | 2 |
| miR-146a*G | 73 | AFF3     | AF4/FMR2 family - member 3 isoform 1              | NM_002285    | 0,42 | 5 |
| miR-146a*G | 74 | TAP2     | transporter 2 - ATP-binding cassette - sub-family | NM_000544    | 0,42 | 3 |
| miR-146a*G | 75 | KIAA1045 | hypothetical protein LOC23349                     | NM_015297    | 0,42 | 5 |
| miR-146a*G | 75 | MED13    | mediator complex subunit 13                       | NM_005121    | 0,42 | 3 |
| miR-146a*G | 77 | ICMT     | isoprenylcysteine carboxyl methyltransferase      | NM_012405    | 0,42 | 3 |
| miR-146a*G | 78 | PDCD6IP  | programmed cell death 6 interacting protein       | NM_013374    | 0,42 | 4 |
| miR-146a*G | 79 | CREB3L2  | cAMP responsive element binding protein 3-like    | NM_194071    | 0,41 | 2 |
| miR-146a*G | 80 | TFCP2L1  | LBP-9                                             | NM_014553    | 0,41 | 2 |
| miR-146a*G | 80 | TMTC1    | transmembrane and tetratricopeptide repeat        | NM_175861    | 0,41 | 2 |
| miR-146a*G | 82 | PAPPA    | pregnancy-associated plasma protein A             | NM_002581    | 0,40 | 4 |
| miR-146a*G | 82 | S100A7A  | S100 calcium binding protein A7-like 1            | NM_176823    | 0,40 | 4 |
| miR-146a*G | 84 | MYO6     | myosin VI                                         | NM_004999    | 0,40 | 4 |
| miR-146a*G | 85 | RBM9     | RNA binding motif protein 9 isoform 3             | NM_001082576 | 0,40 | 4 |
| miR-146a*G | 85 | RBM9     | RNA binding motif protein 9 isoform 2             | NM_014309    | 0,40 | 4 |
| miR-146a*G | 87 | KLHL14   | kelch-like 14                                     | NM_020805    | 0,40 | 2 |
| miR-146a*G | 87 | SEMA3D   | semaphorin 3D                                     | NM_152754    | 0,40 | 2 |
| miR-146a*G | 89 | MKL2     | megakaryoblastic leukemia 2 protein               | NM_014048    | 0,40 | 7 |
| miR-146a*G | 90 | SLFN5    | schlafen family member 5                          | NM_144975    | 0,40 | 3 |
| miR-146a*G | 91 | MYO10    | myosin X                                          | NM_012334    | 0,40 | 4 |
| miR-146a*G | 92 | BCL2     | B-cell lymphoma protein 2 alpha isoform           | NM_000633    | 0,39 | 2 |
| miR-146a*G | 92 | FLJ37543 | hypothetical protein LOC285668                    | NM_173667    | 0,39 | 2 |
| miR-146a*G | 94 | THAP6    | THAP domain containing 6                          | NM_144721    | 0,39 | 2 |
| miR-146a*G | 94 | SEMA5A   | semaphorin 5A                                     | NM_003966    | 0,39 | 4 |

|            |     |              |                                                   |              |      |   |
|------------|-----|--------------|---------------------------------------------------|--------------|------|---|
| miR-146a*G | 96  | LOC100113407 | hypothetical protein LOC100113407                 | NM_001100829 | 0,39 | 5 |
| miR-146a*G | 97  | ARHGAP26     | GTPase regulator associated with the focal        | NM_015071    | 0,39 | 3 |
| miR-146a*G | 98  | GIT2         | G protein-coupled receptor kinase-interactor 2    | NM_057169    | 0,39 | 4 |
| miR-146a*G | 99  | EPB41L5      | erythrocyte membrane protein band 4.1 like 5      | NM_020909    | 0,39 | 4 |
| miR-146a*G | 100 | STS-1        | Cbl-interacting protein Sts-1                     | NM_032873    | 0,38 | 2 |
| miR-146a*G | 100 | INTS6        | integrator complex subunit 6 isoform a            | NM_012141    | 0,38 | 2 |
| miR-146a*G | 102 | SCN2A        | sodium channel - voltage-gated - type II - alpha  | NM_001040142 | 0,38 | 3 |
| miR-146a*G | 103 | GALK2        | galactokinase 2 isoform 2                         | NM_001001556 | 0,38 | 2 |
| miR-146a*G | 104 | FAM74A3      | hypothetical protein LOC728495                    | NM_001098718 | 0,38 | 2 |
| miR-146a*G | 104 | IL1RAP       | interleukin 1 receptor accessory protein isoform  | NM_002182    | 0,38 | 2 |
| miR-146a*G | 104 | RAB3IP       | RAB3A interacting protein isoform A               | NM_001024647 | 0,38 | 4 |
| miR-146a*G | 104 | RAB18        | RAB18 - member RAS oncogene family                | NM_021252    | 0,38 | 2 |
| miR-146a*G | 104 | LRCH2        | leucine-rich repeats and calponin homology (CH)   | NM_020871    | 0,38 | 2 |
| miR-146a*G | 104 | RAB3IP       | RAB3A interacting protein isoform beta 1          | NM_175624    | 0,38 | 4 |
| miR-146a*G | 104 | SPG20        | spastic paraplegia 20                             | NM_015087    | 0,38 | 2 |
| miR-146a*G | 104 | FAM122B      | hypothetical protein LOC159090                    | NM_145284    | 0,38 | 3 |
| miR-146a*G | 112 | IL20         | interleukin 20 precursor                          | NM_018724    | 0,38 | 2 |
| miR-146a*G | 112 | PTAR1        | protein prenyltransferase alpha subunit repeat    | NM_001099666 | 0,38 | 2 |
| miR-146a*G | 112 | CNBP         | CCHC-type zinc finger - nucleic acid binding      | NM_003418    | 0,38 | 2 |
| miR-146a*G | 112 | CNOT4        | CCR4-NOT transcription complex - subunit 4        | NM_013316    | 0,38 | 2 |
| miR-146a*G | 112 | CAMSAP1L1    | calmodulin regulated spectrin-associated protein  | NM_203459    | 0,38 | 2 |
| miR-146a*G | 117 | AGPAT4       | 1-acylglycerol-3-phosphate O-acyltransferase 4    | NM_020133    | 0,38 | 5 |
| miR-146a*G | 118 | TMTC2        | transmembrane and tetratricopeptide repeat        | NM_152588    | 0,38 | 2 |
| miR-146a*G | 118 | ARL15        | ADP-ribosylation factor-like 15                   | NM_019087    | 0,38 | 2 |
| miR-146a*G | 120 | SESN1        | sestrin 1                                         | NM_014454    | 0,38 | 2 |
| miR-146a*G | 120 | CNGA3        | cyclic nucleotide gated channel alpha 3 isoform   | NM_001298    | 0,38 | 3 |
| miR-146a*G | 122 | PGAP1        | GPI deacylase                                     | NM_024989    | 0,37 | 3 |
| miR-146a*G | 123 | NEDD4        | neural precursor cell expressed - developmentally | NM_198400    | 0,37 | 2 |
| miR-146a*G | 124 | C18orf25     | ARKadia-like 1 isoform a                          | NM_145055    | 0,37 | 3 |

|            |     |          |                                                   |              |      |   |
|------------|-----|----------|---------------------------------------------------|--------------|------|---|
| miR-146a*G | 125 | PANX1    | pannexin 1                                        | NM_015368    | 0,37 | 3 |
| miR-146a*G | 125 | COL8A2   | collagen - type VIII - alpha 2                    | NM_005202    | 0,37 | 3 |
| miR-146a*G | 127 | LOXL4    | lysyl oxidase-like 4 precursor                    | NM_032211    | 0,37 | 2 |
| miR-146a*G | 128 | GNG12    | G-protein gamma-12 subunit                        | NM_018841    | 0,37 | 2 |
| miR-146a*G | 128 | C2orf56  | hypothetical protein LOC55471 isoform 1           | NM_144736    | 0,37 | 2 |
| miR-146a*G | 130 | ZNF652   | zinc finger protein 652                           | NM_014897    | 0,37 | 3 |
| miR-146a*G | 131 | RICTOR   | rapamycin-insensitive companion of mTOR           | NM_152756    | 0,37 | 2 |
| miR-146a*G | 131 | CNOT6L   | CCR4-NOT transcription complex - subunit 6-like   | NM_144571    | 0,37 | 2 |
| miR-146a*G | 131 | H2AFJ    | H2A histone family - member J                     | NM_177925    | 0,37 | 4 |
| miR-146a*G | 131 | FYTTD1   | forty-two-three domain containing 1 isoform 1     | NM_032288    | 0,37 | 2 |
| miR-146a*G | 135 | NR2C2    | nuclear receptor subfamily 2 - group C - member 2 | NM_003298    | 0,36 | 4 |
| miR-146a*G | 136 | MET      | met proto-oncogene precursor                      | NM_000245    | 0,36 | 3 |
| miR-146a*G | 136 | NTRK2    | neurotrophic tyrosine kinase - receptor - type 2  | NM_001018065 | 0,36 | 3 |
| miR-146a*G | 136 | IKBKB    | inhibitor of kappa light polypeptide gene         | NM_001556    | 0,36 | 3 |
| miR-146a*G | 136 | COBL     | cordon-bleu homolog                               | NM_015198    | 0,36 | 4 |
| miR-146a*G | 140 | USP31    | ubiquitin specific peptidase 31                   | NM_020718    | 0,36 | 3 |
| miR-146a*G | 140 | TAOK3    | TAO kinase 3                                      | NM_016281    | 0,36 | 3 |
| miR-146a*G | 140 | GLCCI1   | glucocorticoid induced transcript 1               | NM_138426    | 0,36 | 2 |
| miR-146a*G | 140 | CCDC4    | coiled-coil domain containing 4                   | NM_207406    | 0,36 | 3 |
| miR-146a*G | 140 | PI15     | protease inhibitor 15 preproprotein               | NM_015886    | 0,36 | 2 |
| miR-146a*G | 145 | WNK3     | WNK lysine deficient protein kinase 3 isoform 1   | NM_020922    | 0,36 | 3 |
| miR-146a*G | 146 | ETF1     | eukaryotic translation termination factor 1       | NM_004730    | 0,36 | 3 |
| miR-146a*G | 147 | RAP2A    | RAP2A - member of RAS oncogene family             | NM_021033    | 0,36 | 3 |
| miR-146a*G | 148 | DRP2     | dystrophin related protein 2                      | NM_001939    | 0,36 | 5 |
| miR-146a*G | 149 | PIPOX    | L-pipecolic acid oxidase                          | NM_016518    | 0,36 | 2 |
| miR-146a*G | 150 | ALG9     | asparagine-linked glycosylation 9 protein         | NM_024740    | 0,36 | 5 |
| miR-146a*G | 150 | MYT1     | myelin transcription factor 1                     | NM_004535    | 0,36 | 4 |
| miR-146a*G | 152 | USP24    | ubiquitin specific protease 24                    | NM_015306    | 0,36 | 2 |
| miR-146a*G | 153 | NF2      | neurofibromin 2 isoform 7                         | NM_181830    | 0,35 | 4 |
| miR-146a*G | 153 | NF2      | neurofibromin 2 isoform 2                         | NM_181832    | 0,35 | 4 |
| miR-146a*G | 153 | NF2      | neurofibromin 2 isoform 1                         | NM_000268    | 0,35 | 4 |
| miR-146a*G | 156 | SH3GL2   | SH3-domain GRB2-like 2                            | NM_003026    | 0,35 | 2 |
| miR-146a*G | 157 | PPP1R12A | protein phosphatase 1 - regulatory (inhibitor)    | NM_002480    | 0,35 | 2 |

|            |     |       |                                                |              |      |   |
|------------|-----|-------|------------------------------------------------|--------------|------|---|
| miR-146a*G | 157 | ASXL2 | additional sex combs like 2                    | NM_018263    | 0,35 | 2 |
| miR-146a*G | 157 | KLF10 | Kruppel-like factor 10 isoform b               | NM_001032282 | 0,35 | 2 |
| miR-146a*G | 157 | FGF5  | fibroblast growth factor 5 isoform 1 precursor | NM_004464    | 0,35 | 2 |
| miR-146a*G | 157 | KLF10 | Kruppel-like factor 10 isoform a               | NM_005655    | 0,35 | 2 |
| miR-146a*G | 157 | FGF5  | fibroblast growth factor 5 isoform 2 precursor | NM_033143    | 0,35 | 2 |

**Target genes predicted for miR-146a\*C**

| microRNA   | Rank | GeneName | Gene/Isoform Description                          | Refseq ID    | TargetRank Score | Seed matches |
|------------|------|----------|---------------------------------------------------|--------------|------------------|--------------|
| miR-146a*C | 1    | FLJ25778 | hypothetical protein LOC254048                    | NM_173569    | 1,23             | 8            |
| miR-146a*C | 2    | IL17RD   | interleukin 17 receptor D isoform hSef-b          | NM_017563    | 0,99             | 8            |
| miR-146a*C | 3    | RIOK3    | sudD suppressor of bimD6 homolog                  | NM_003831    | 0,96             | 3            |
| miR-146a*C | 4    | PRX      | periaxin isoform 1                                | NM_020956    | 0,92             | 10           |
| miR-146a*C | 5    | SH3BGRL2 | SH3 domain binding glutamic acid-rich protein     | NM_031469    | 0,89             | 8            |
| miR-146a*C | 6    | ZHX3     | zinc fingers and homeoboxes 3                     | NM_015035    | 0,85             | 7            |
| miR-146a*C | 7    | KLHL24   | DRE1 protein                                      | NM_017644    | 0,82             | 3            |
| miR-146a*C | 8    | CPLX2    | complexin 2                                       | NM_001008220 | 0,81             | 5            |
| miR-146a*C | 9    | HMGCR    | 3-hydroxy-3-methylglutaryl-Coenzyme A reductase   | NM_000859    | 0,80             | 5            |
| miR-146a*C | 10   | PCDH17   | protocadherin 17 precursor                        | NM_001040429 | 0,73             | 4            |
| miR-146a*C | 11   | LARP4    | c-Mpl binding protein isoform c                   | NM_199190    | 0,73             | 4            |
| miR-146a*C | 12   | VANGL1   | vang-like 1                                       | NM_138959    | 0,70             | 5            |
| miR-146a*C | 13   | KLF12    | Kruppel-like factor 12                            | NM_007249    | 0,70             | 8            |
| miR-146a*C | 14   | BNC2     | basonuclin 2                                      | NM_017637    | 0,69             | 7            |
| miR-146a*C | 15   | IKZF2    | helios isoform 1                                  | NM_016260    | 0,68             | 5            |
| miR-146a*C | 16   | ZC3HAV1  | zinc finger antiviral protein isoform 1           | NM_020119    | 0,67             | 6            |
| miR-146a*C | 17   | FOXC1    | forkhead box C1                                   | NM_001453    | 0,67             | 3            |
| miR-146a*C | 18   | PLEKHA7  | pleckstrin homology domain containing - family A  | NM_175058    | 0,67             | 6            |
| miR-146a*C | 19   | OSBPL3   | oxysterol-binding protein-like protein 3 isoform  | NM_015550    | 0,66             | 3            |
| miR-146a*C | 20   | PLCXD3   | phosphatidylinositol-specific phospholipase C - X |              | 0,62             | 3            |

|            |    |          |                                                  |              |      |   |
|------------|----|----------|--------------------------------------------------|--------------|------|---|
|            |    |          |                                                  | NM_001005473 |      |   |
| miR-146a*C | 21 | TNKS     | tankyrase - TRF1-interacting ankyrin-related     | NM_003747    | 0,62 | 4 |
| miR-146a*C | 22 | GABRB2   | gamma-aminobutyric acid (GABA) A receptor - beta | NM_021911    | 0,61 | 6 |
| miR-146a*C | 23 | TTC14    | tetratricopeptide repeat domain 14 isoform b     | NM_001042601 | 0,60 | 3 |
| miR-146a*C | 24 | SARM1    | sterile alpha and TIR motif containing 1         | NM_015077    | 0,59 | 7 |
| miR-146a*C | 25 | TRIM33   | tripartite motif-containing 33 protein isoform   | NM_033020    | 0,59 | 2 |
| miR-146a*C | 26 | CP       | ceruloplasmin precursor                          | NM_000096    | 0,58 | 3 |
| miR-146a*C | 26 | SLC6A15  | solute carrier family 6 - member 15 isoform 1    | NM_182767    | 0,58 | 4 |
| miR-146a*C | 28 | NSUN7    | NOL1/NOP2/Sun domain family - member 7           | NM_024677    | 0,57 | 4 |
| miR-146a*C | 29 | ARHGEF12 | Rho guanine nucleotide exchange factor (GEF) 12  | NM_015313    | 0,57 | 4 |
| miR-146a*C | 30 | MEX3A    | MEX3A protein                                    | NM_001093725 | 0,56 | 4 |
| miR-146a*C | 31 | MARCH6   | membrane-associated ring finger (C3HC4) 6        | NM_005885    | 0,56 | 3 |
| miR-146a*C | 32 | ZNF100   | zinc finger protein 100                          | NM_173531    | 0,56 | 5 |
| miR-146a*C | 33 | MLH3     | mutL homolog 3 isoform 2                         | NM_014381    | 0,56 | 6 |
| miR-146a*C | 34 | LIN28B   | lin-28 homolog B                                 | NM_001004317 | 0,56 | 3 |
| miR-146a*C | 35 | SPIN1    | spindlin                                         | NM_006717    | 0,55 | 5 |
| miR-146a*C | 36 | FLJ38482 | hypothetical protein LOC201931                   | NM_001100389 | 0,54 | 4 |
| miR-146a*C | 37 | AHCYL1   | S-adenosylhomocysteine hydrolase-like 1          | NM_006621    | 0,54 | 4 |
| miR-146a*C | 38 | AVPR1A   | arginine vasopressin receptor 1A                 | NM_000706    | 0,54 | 2 |
| miR-146a*C | 39 | ATP6V1C2 | vacuolar H+ ATPase C2 isoform a                  | NM_001039362 | 0,54 | 3 |
| miR-146a*C | 40 | NRCAM    | neuronal cell adhesion molecule isoform B        | NM_005010    | 0,53 | 3 |
| miR-146a*C | 41 | KPNA1    | karyopherin alpha 1                              | NM_002264    | 0,53 | 3 |
| miR-146a*C | 42 | OPCML    | opioid binding protein/cell adhesion             | NM_001012393 | 0,53 | 3 |
| miR-146a*C | 43 | PODXL    | podocalyxin-like isoform 1 precursor             | NM_001018111 | 0,53 | 4 |
| miR-146a*C | 44 | SLC24A4  | solute carrier family 24 member 4 isoform 2      | NM_153647    | 0,53 | 3 |
| miR-146a*C | 45 | GABRA4   | gamma-aminobutyric acid A receptor - alpha 4     | NM_000809    | 0,52 | 6 |
| miR-146a*C | 46 | DDX3X    | DEAD/H (Asp-Glu-Ala-Asp/His) box polypeptide 3   | NM_001356    | 0,52 | 2 |
| miR-146a*C | 47 | SOBP     | sine oculis binding protein homolog              | NM_018013    | 0,52 | 4 |

|            |    |           |                                                 |              |      |    |
|------------|----|-----------|-------------------------------------------------|--------------|------|----|
| miR-146a*C | 48 | HABP2     | hyaluronan binding protein 2                    | NM_004132    | 0,52 | 4  |
| miR-146a*C | 49 | UBFD1     | ubiquitin-binding protein homolog               | NM_019116    | 0,52 | 5  |
| miR-146a*C | 50 | BTBD7     | BTB (POZ) domain containing 7 isoform 1         | NM_001002860 | 0,51 | 3  |
| miR-146a*C | 51 | BCAT1     | branched chain aminotransferase 1 - cytosolic   | NM_005504    | 0,51 | 4  |
| miR-146a*C | 52 | TRAF3IP1  | TNF receptor-associated factor 3 interacting    | NM_015650    | 0,51 | 2  |
| miR-146a*C | 52 | MTX3      | metaxin 3                                       | NM_001010891 | 0,51 | 3  |
| miR-146a*C | 54 | KIAA1909  | hypothetical protein LOC153478                  | NM_052909    | 0,50 | 11 |
| miR-146a*C | 55 | MAPK1     | mitogen-activated protein kinase 1              | NM_002745    | 0,50 | 4  |
| miR-146a*C | 56 | PRKAB2    | AMP-activated protein kinase beta 2             | NM_005399    | 0,50 | 3  |
| miR-146a*C | 57 | TMEM154   | hypothetical protein LOC201799                  | NM_152680    | 0,49 | 4  |
| miR-146a*C | 58 | SH3GLB1   | SH3-containing protein SH3GLB1                  | NM_016009    | 0,49 | 2  |
| miR-146a*C | 59 | XPO4      | exportin 4                                      | NM_022459    | 0,49 | 3  |
| miR-146a*C | 60 | SNX27     | sorting nexin family member 27                  | NM_030918    | 0,49 | 4  |
| miR-146a*C | 61 | C14orf129 | hypothetical protein LOC51527                   | NM_016472    | 0,48 | 2  |
| miR-146a*C | 61 | C1orf124  | hypothetical protein LOC83932 isoform b         | NM_001010984 | 0,48 | 5  |
| miR-146a*C | 63 | ATXN1     | ataxin 1                                        | NM_000332    | 0,48 | 4  |
| miR-146a*C | 64 | PPARA     | peroxisome proliferative activated receptor -   | NM_005036    | 0,48 | 5  |
| miR-146a*C | 65 | CXCR7     | chemokine orphan receptor 1                     | NM_020311    | 0,48 | 3  |
| miR-146a*C | 66 | CCDC93    | coiled-coil domain containing 93                | NM_019044    | 0,48 | 6  |
| miR-146a*C | 66 | SERTAD2   | SERTA domain containing 2                       | NM_014755    | 0,48 | 2  |
| miR-146a*C | 68 | NNT       | nicotinamide nucleotide transhydrogenase        | NM_182977    | 0,48 | 2  |
| miR-146a*C | 69 | SPRED1    | sprouty-related protein 1 with EVH-1 domain     | NM_152594    | 0,47 | 2  |
| miR-146a*C | 69 | ARID4A    | retinoblastoma-binding protein 1 isoform II     | NM_023000    | 0,47 | 3  |
| miR-146a*C | 69 | LOC153364 | similar to metallo-beta-lactamase superfamily   | NM_203406    | 0,47 | 3  |
| miR-146a*C | 69 | NFAT5     | nuclear factor of activated T-cells 5 isoform c | NM_006599    | 0,47 | 3  |
| miR-146a*C | 73 | HUNK      | hormonally upregulated Neu-associated kinase    | NM_014586    | 0,47 | 6  |
| miR-146a*C | 74 | TBC1D4    | TBC1 domain family - member 4                   | NM_014832    | 0,47 | 3  |
| miR-146a*C | 75 | TMEPAI    | transmembrane prostate androgen-induced protein | NM_020182    | 0,47 | 3  |
| miR-146a*C | 76 | CNR1      | central cannabinoid receptor isoform b          | NM_033181    | 0,47 | 5  |
| miR-146a*C | 77 | FMO2      | flavin containing monooxygenase 2               | NM_001460    | 0,47 | 3  |
| miR-146a*C | 78 | STK4      | serine/threonine kinase 4                       | NM_006282    | 0,47 | 6  |

|            |     |          |                                                  |              |      |   |
|------------|-----|----------|--------------------------------------------------|--------------|------|---|
| miR-146a*C | 79  | ERC1     | RAB6-interacting protein 2 isoform beta          | NM_178037    | 0,47 | 4 |
| miR-146a*C | 80  | C1orf21  | chromosome 1 open reading frame 21               | NM_030806    | 0,46 | 6 |
| miR-146a*C | 81  | MON2     | MON2 homolog                                     | NM_015026    | 0,46 | 2 |
| miR-146a*C | 81  | UACA     | uveal autoantigen with coiled-coil domains and   | NM_001008224 | 0,46 | 2 |
| miR-146a*C | 83  | SH3PXD2A | SH3 multiple domains 1                           | NM_014631    | 0,46 | 9 |
| miR-146a*C | 84  | WDR7     | rabconnectin-3 beta isoform 2                    | NM_052834    | 0,46 | 3 |
| miR-146a*C | 85  | IGSF3    | immunoglobulin superfamily - member 3 isoform 2  | NM_001007237 | 0,46 | 2 |
| miR-146a*C | 86  | CREBZF   | HCF-binding transcription factor Zhangfei        | NM_001039618 | 0,46 | 3 |
| miR-146a*C | 86  | KIAA1199 | KIAA1199                                         | NM_018689    | 0,46 | 6 |
| miR-146a*C | 88  | DTNA     | dystrobrevin alpha isoform 2                     | NM_032975    | 0,46 | 4 |
| miR-146a*C | 89  | FOXN2    | T-cell leukemia virus enhancer factor            | NM_002158    | 0,45 | 2 |
| miR-146a*C | 90  | CGGBP1   | CGG triplet repeat binding protein 1             | NM_001008390 | 0,45 | 2 |
| miR-146a*C | 91  | STEAP2   | six transmembrane epithelial antigen of the      | NM_152999    | 0,45 | 2 |
| miR-146a*C | 92  | ELAVL1   | ELAV-like 1                                      | NM_001419    | 0,45 | 3 |
| miR-146a*C | 93  | B3GNT5   | UDP-GlcNAc:betaGal                               | NM_032047    | 0,44 | 3 |
| miR-146a*C | 94  | ENTPD1   | ectonucleoside triphosphate diphosphohydrolase 1 | NM_001098175 | 0,44 | 3 |
| miR-146a*C | 95  | SCAMP1   | secretory carrier membrane protein 1             | NM_004866    | 0,44 | 2 |
| miR-146a*C | 96  | NFASC    | neurofascin precursor                            | NM_015090    | 0,44 | 5 |
| miR-146a*C | 97  | PCDH19   | protocadherin 19                                 | NM_020766    | 0,44 | 2 |
| miR-146a*C | 97  | YTHDF2   | high glucose-regulated protein 8                 | NM_016258    | 0,44 | 2 |
| miR-146a*C | 97  | CSNK1G1  | casein kinase 1 - gamma 1                        | NM_022048    | 0,44 | 6 |
| miR-146a*C | 100 | SLC1A2   | excitatory amino acid transporter 2              | NM_004171    | 0,44 | 5 |
| miR-146a*C | 100 | CLIC5    | chloride intracellular channel 5                 | NM_016929    | 0,44 | 4 |
| miR-146a*C | 102 | DUSP13   | muscle-restricted dual specificity phosphatase   | NM_001007271 | 0,44 | 2 |
| miR-146a*C | 103 | COMMD8   | COMM domain containing 8                         | NM_017845    | 0,43 | 2 |
| miR-146a*C | 104 | TMCC3    | transmembrane and coiled-coil domain family 3    | NM_020698    | 0,43 | 3 |
| miR-146a*C | 105 | SSH2     | slingshot 2                                      | NM_033389    | 0,43 | 4 |
| miR-146a*C | 106 | OPHN1    | oligophrenin 1                                   | NM_002547    | 0,43 | 4 |
| miR-146a*C | 107 | PCGF5    | polycomb group ring finger 5                     | NM_032373    | 0,43 | 2 |

|            |     |           |                                                   |              |      |   |
|------------|-----|-----------|---------------------------------------------------|--------------|------|---|
| miR-146a*C | 108 | ERC1      | RAB6-interacting protein 2 isoform delta          | NM_178039    | 0,43 | 3 |
| miR-146a*C | 108 | SLC5A3    | solute carrier family 5 (inositol transporters) - | NM_006933    | 0,43 | 5 |
| miR-146a*C | 110 | OPRK1     | opioid receptor - kappa 1                         | NM_000912    | 0,42 | 4 |
| miR-146a*C | 111 | RAG1      | recombination activating gene 1                   | NM_000448    | 0,42 | 2 |
| miR-146a*C | 112 | HLF       | hepatic leukemia factor                           | NM_002126    | 0,42 | 2 |
| miR-146a*C | 113 | EXOC5     | SEC10 protein                                     | NM_006544    | 0,42 | 3 |
| miR-146a*C | 113 | C20orf197 | hypothetical protein LOC284756                    | NM_173644    | 0,42 | 2 |
| miR-146a*C | 113 | ZAK       | MLK-related kinase isoform 2                      | NM_133646    | 0,42 | 3 |
| miR-146a*C | 116 | TMEM30A   | transmembrane protein 30A                         | NM_018247    | 0,42 | 3 |
| miR-146a*C | 117 | ZNF781    | zinc finger protein 781                           | NM_152605    | 0,42 | 3 |
| miR-146a*C | 117 | SRL       | sarcalumenin                                      | NM_001098814 | 0,42 | 3 |
| miR-146a*C | 119 | FBXO33    | F-box protein 33                                  | NM_203301    | 0,42 | 3 |
| miR-146a*C | 120 | AFAP1     | actin filament associated protein 1               | NM_021638    | 0,42 | 4 |
| miR-146a*C | 121 | LOC283514 | hypothetical protein LOC283514                    | NM_198849    | 0,41 | 6 |
| miR-146a*C | 122 | WARS2     | mitochondrial tryptophanyl tRNA synthetase 2      | NM_201263    | 0,41 | 2 |
| miR-146a*C | 122 | WARS2     | mitochondrial tryptophanyl tRNA synthetase 2      | NM_015836    | 0,41 | 2 |
| miR-146a*C | 124 | CLCN5     | chloride channel 5                                | NM_000084    | 0,41 | 5 |
| miR-146a*C | 125 | NAT11     | N-acetyltransferase 11                            | NM_024771    | 0,41 | 5 |
| miR-146a*C | 126 | FOXO3     | forkhead box O3A                                  | NM_201559    | 0,41 | 3 |
| miR-146a*C | 127 | HHEX      | hematopoietically expressed homeobox              | NM_002729    | 0,41 | 3 |
| miR-146a*C | 128 | ZNF273    | zinc finger protein 273                           | NM_021148    | 0,41 | 4 |
| miR-146a*C | 129 | CLCN6     | chloride channel 6 isoform CIC-6a                 | NM_001286    | 0,41 | 5 |
| miR-146a*C | 129 | SLC6A2    | solute carrier family 6 member 2                  | NM_001043    | 0,41 | 3 |
| miR-146a*C | 131 | ADNP2     | ADNP homeobox 2                                   | NM_014913    | 0,40 | 3 |
| miR-146a*C | 132 | HNRPA0    | heterogeneous nuclear ribonucleoprotein A0        | NM_006805    | 0,40 | 2 |
| miR-146a*C | 133 | UNC13A    | unc-13 homolog A                                  | NM_001080421 | 0,40 | 4 |
| miR-146a*C | 134 | LITAF     | lipopolysaccharide-induced TNF factor             | NM_004862    | 0,40 | 3 |
| miR-146a*C | 135 | CD44      | CD44 antigen isoform 3 precursor                  | NM_001001390 | 0,40 | 5 |
| miR-146a*C | 135 | CD44      | CD44 antigen isoform 5 precursor                  | NM_001001392 | 0,40 | 5 |
| miR-146a*C | 135 | C6orf62   | chromosome 6 open reading frame 62                | NM_030939    | 0,40 | 2 |
| miR-146a*C | 138 | MITF      | microphthalmia-associated transcription factor    | NM_000248    | 0,40 | 2 |

|            |     |          |                                                    |              |      |   |
|------------|-----|----------|----------------------------------------------------|--------------|------|---|
| miR-146a*C | 139 | ANKRD22  | ankyrin repeat domain 22                           | NM_144590    | 0,40 | 3 |
| miR-146a*C | 140 | GALNT17  | polypeptide N-acetylgalactosaminyltransferase      | NM_001034845 | 0,40 | 2 |
| miR-146a*C | 141 | WDHD1    | WD repeat and HMG-box DNA binding protein 1        | NM_007086    | 0,39 | 2 |
| miR-146a*C | 141 | UNC13B   | UNC13 (C. elegans)-like                            | NM_006377    | 0,39 | 2 |
| miR-146a*C | 141 | RC3H1    | roquin                                             | NM_172071    | 0,39 | 2 |
| miR-146a*C | 144 | MANEA    | mannosidase - endo-alpha                           | NM_024641    | 0,39 | 4 |
| miR-146a*C | 145 | PPM1F    | protein phosphatase 1F                             | NM_014634    | 0,39 | 4 |
| miR-146a*C | 146 | SRGAP3   | SLIT-ROBO Rho GTPase activating protein 3          | NM_014850    | 0,39 | 4 |
| miR-146a*C | 146 | TRAK1    | OGT(O-Glc-NAc transferase)-interacting protein     | NM_001042646 | 0,39 | 2 |
| miR-146a*C | 148 | SLC38A1  | amino acid transporter system A1                   | NM_030674    | 0,39 | 5 |
| miR-146a*C | 149 | ZNF618   | zinc finger protein 618                            | NM_133374    | 0,39 | 3 |
| miR-146a*C | 149 | PEX11B   | peroxisomal biogenesis factor 11B                  | NM_003846    | 0,39 | 2 |
| miR-146a*C | 149 | TAF5L    | PCAF associated factor 65 beta isoform a           | NM_014409    | 0,39 | 2 |
| miR-146a*C | 149 | FZD4     | frizzled 4                                         | NM_012193    | 0,39 | 2 |
| miR-146a*C | 153 | SELT     | selenoprotein T                                    | NM_016275    | 0,39 | 2 |
| miR-146a*C | 153 | PDS5A    | PDS5 - regulator of cohesion maintenance - homolog | NM_015200    | 0,39 | 4 |
| miR-146a*C | 153 | CLLU1    | chronic lymphocytic leukemia up-regulated 1        | NM_001025233 | 0,39 | 5 |
| miR-146a*C | 156 | SORT1    | sortilin 1 preproprotein                           | NM_002959    | 0,39 | 3 |
| miR-146a*C | 157 | ARHGAP26 | GTPase regulator associated with the focal         | NM_015071    | 0,39 | 4 |
| miR-146a*C | 158 | ATG2B    | ATG2 autophagy related 2 homolog B                 | NM_018036    | 0,39 | 7 |
| miR-146a*C | 159 | ZBED4    | zinc finger - BED-type containing 4                | NM_014838    | 0,38 | 3 |
| miR-146a*C | 159 | TRDMT1   | tRNA aspartic acid methyltransferase 1 isoform     | NM_004412    | 0,38 | 3 |
| miR-146a*C | 159 | TLL2     | tolloid-like 2                                     | NM_012465    | 0,38 | 3 |
| miR-146a*C | 162 | NPAS2    | neuronal PAS domain protein 2                      | NM_002518    | 0,38 | 3 |
| miR-146a*C | 163 | CNTD1    | cyclin N-terminal domain containing 1              | NM_173478    | 0,38 | 2 |
| miR-146a*C | 164 | ATCB10   | ATP-binding cassette - sub-family B - member 10    | NM_012089    | 0,38 | 2 |
| miR-146a*C | 164 | SET      | SET translocation (myeloid leukemia-associated)    | NM_003011    | 0,38 | 2 |
| miR-146a*C | 164 | MAPRE1   | microtubule-associated protein - RP/EB family -    | NM_012325    | 0,38 | 2 |
| miR-146a*C | 164 | FCHO2    | FCH domain only 2                                  | NM_138782    | 0,38 | 2 |
| miR-146a*C | 168 | ALCAM    | activated leukocyte cell adhesion molecule         | NM_001627    | 0,38 | 2 |
| miR-146a*C | 168 | CFL2     | cofilin 2                                          | NM_021914    | 0,38 | 2 |

|            |     |           |                                                   |              |      |   |
|------------|-----|-----------|---------------------------------------------------|--------------|------|---|
| miR-146a*C | 168 | PPP2R5C   | gamma isoform of regulatory subunit B56 - protein | NM_002719    | 0,38 | 2 |
| miR-146a*C | 168 | MME       | membrane metallo-endopeptidase                    | NM_000902    | 0,38 | 2 |
| miR-146a*C | 168 | VAPB      | VAMP-associated protein B/C                       | NM_004738    | 0,38 | 2 |
| miR-146a*C | 168 | HIF1A     | hypoxia-inducible factor 1 - alpha subunit        | NM_181054    | 0,38 | 2 |
| miR-146a*C | 168 | MAP3K7IP3 | mitogen-activated protein kinase kinase kinase 7  | NM_152787    | 0,38 | 2 |
| miR-146a*C | 168 | DLG2      | chapsyn-110                                       | NM_001364    | 0,38 | 2 |
| miR-146a*C | 168 | RAB22A    | RAS-related protein RAB-22A                       | NM_020673    | 0,38 | 4 |
| miR-146a*C | 168 | KIAA0652  | hypothetical protein LOC9776                      | NM_014741    | 0,38 | 2 |
| miR-146a*C | 178 | BAZ2A     | bromodomain adjacent to zinc finger domain - 2A   | NM_013449    | 0,38 | 5 |
| miR-146a*C | 179 | KIAA1549  | hypothetical protein LOC57670                     | NM_020910    | 0,38 | 3 |
| miR-146a*C | 179 | HISPPD1   | Histidine acid phosphatase domain containing 1    | NM_015216    | 0,38 | 2 |
| miR-146a*C | 179 | TCF3      | transcription factor 3                            | NM_003200    | 0,38 | 2 |
| miR-146a*C | 182 | LSM14A    | LSM14 homolog A                                   | NM_015578    | 0,37 | 3 |
| miR-146a*C | 183 | CHST3     | carbohydrate (chondroitin 6) sulfotransferase 3   | NM_004273    | 0,37 | 3 |
| miR-146a*C | 183 | C14orf32  | MAPK-interacting and spindle-stabilizing          | NM_144578    | 0,37 | 4 |
| miR-146a*C | 183 | KDEL3     | KDEL receptor 3 isoform a                         | NM_006855    | 0,37 | 2 |
| miR-146a*C | 183 | FLJ20309  | hypothetical protein LOC54891                     | NM_017759    | 0,37 | 4 |
| miR-146a*C | 187 | ADAMTS5   | ADAM metalloproteinase with thrombospondin type 1 | NM_007038    | 0,37 | 4 |
| miR-146a*C | 188 | UST       | uronyl-2-sulfotransferase                         | NM_005715    | 0,37 | 3 |
| miR-146a*C | 189 | C10orf46  | chromosome 10 open reading frame 46               | NM_153810    | 0,37 | 3 |
| miR-146a*C | 190 | KTN1      | kinectin 1 isoform a                              | NM_182926    | 0,37 | 2 |
| miR-146a*C | 191 | SEMA3E    | semaphorin 3E                                     | NM_012431    | 0,37 | 2 |
| miR-146a*C | 192 | C8orf46   | hypothetical protein LOC254778                    | NM_152765    | 0,37 | 2 |
| miR-146a*C | 193 | SSTR2     | somatostatin receptor 2                           | NM_001050    | 0,37 | 2 |
| miR-146a*C | 193 | SLC35A3   | solute carrier family 35                          | NM_012243    | 0,37 | 2 |
| miR-146a*C | 193 | TFEC      | transcription factor EC isoform b                 | NM_001018058 | 0,37 | 2 |
| miR-146a*C | 193 | ARMC8     | armadillo repeat containing 8 isoform 3           | NM_213654    | 0,37 | 2 |
| miR-146a*C | 197 | LYK5      | protein kinase LYK5 isoform 3                     | NM_153335    | 0,37 | 3 |
| miR-146a*C | 197 | NTRK2     | neurotrophic tyrosine kinase - receptor - type 2  | NM_001007097 | 0,37 | 3 |
| miR-146a*C | 199 | KCTD2     | potassium channel tetramerisation domain          | NM_015353    | 0,36 | 3 |
| miR-146a*C | 200 | AFF1      | myeloid/lymphoid or mixed-lineage leukemia        | NM_005935    | 0,36 | 5 |
| miR-146a*C | 201 | EDA       | ectodysplasin A isoform EDA-A2                    |              | 0,36 | 3 |

|            |     |          |                                            |              |      |   |
|------------|-----|----------|--------------------------------------------|--------------|------|---|
|            |     |          |                                            | NM_001005609 |      |   |
| miR-146a*C | 202 | ETV1     | ets variant gene 1                         | NM_004956    | 0,36 | 2 |
| miR-146a*C | 203 | TIPARP   | TCDD-inducible poly(ADP-ribose) polymerase | NM_015508    | 0,36 | 2 |
| miR-146a*C | 203 | SELI     | selenoprotein I                            | NM_033505    | 0,36 | 4 |
| miR-146a*C | 205 | C7orf29  | hypothetical protein LOC113763             | NM_138434    | 0,36 | 3 |
| miR-146a*C | 205 | ZKSCAN1  | zinc finger protein 36                     | NM_003439    | 0,36 | 2 |
| miR-146a*C | 207 | ZNF592   | zinc finger protein 592                    | NM_014630    | 0,36 | 4 |
| miR-146a*C | 208 | ITPKC    | inositol 1 -4 -5-trisphosphate 3-kinase C  | NM_025194    | 0,36 | 6 |
| miR-146a*C | 209 | FLJ16793 | hypothetical protein LOC645121             | NM_001039780 | 0,36 | 2 |
| miR-146a*C | 210 | ZFP91    | zinc finger protein 91                     | NM_053023    | 0,35 | 2 |
| miR-146a*C | 211 | LRRC15   | leucine rich repeat containing 15          | NM_130830    | 0,35 | 4 |
| miR-146a*C | 212 | ZNF257   | zinc finger protein 257                    | NM_033468    | 0,35 | 3 |
| miR-146a*C | 212 | ZNF721   | zinc finger protein 721                    | NM_133474    | 0,35 | 5 |
| miR-146a*C | 214 | ZNF395   | zinc finger protein 395                    | NM_018660    | 0,35 | 4 |
