# Supplementary material
Source: PubMed Central journal article supplement (PMC2635764)
Supplement: 0812591106_ST3_PDF.pdf [file 0812591106_ST3_PDF.pdf]

**Table S3. Comparison of transcriptomes of 4 GC and 6 GG samples derived from the unaffected part of the thyroid glands of PTC cases**

| <b>Affymetrix</b> | <b>Symbol</b> | <b>DAVID ID</b> | <b>Parametric p-value</b> | <b>Ratio of geom means GC/GG</b> |
|-------------------|---------------|-----------------|---------------------------|----------------------------------|
| 214979_AT         | ABCC3         | 3029350         | 0,0180                    | -1,24                            |
| 202850_AT         | ABCD3         | 2872477         | 0,0196                    | 1,36                             |
| 203559_S_AT       | ABP1          | 3027949         | 0,0167                    | -1,22                            |
| 206069_S_AT       | ACADL         | 3029795         | 0,0218                    | 1,44                             |
| 209600_S_AT       | ACOX1         | 2878307         | 0,0241                    | 1,28                             |
| 222230_S_AT       | ACTR10        | 2872123         | 0,0149                    | 1,32                             |
| 207880_AT         | ADAM11        | 2875882         | 0,0070                    | -1,23                            |
| 220866_AT         | ADAMTS6       | 2864925         | 0,0242                    | -1,22                            |
| 217687_AT         | ADCY2         | 2897854         | 0,0085                    | -1,25                            |
| 217161_X_AT       | AGC1          | 2876199         | 0,0182                    | -1,27                            |
| 202588_AT         | AK1           | 2866214         | 0,0212                    | -1,24                            |
| 208212_S_AT       | ALK           | 2859746         | 0,0232                    | -1,21                            |
| 205572_AT         | ANGPT2        | 3025946         | 0,0047                    | 1,47                             |
| 206385_S_AT       | ANK3          | 2874748         | 0,0111                    | 1,44                             |
| 201366_AT         | ANXA7         | 2859244         | 0,0207                    | 1,31                             |
| 209871_S_AT       | APBA2         | 3027790         | 0,0064                    | -1,24                            |
| 206350_AT         | APCS          | 3023914         | 0,0134                    | -1,23                            |
| 218230_AT         | ARFIP1        | 2860279         | 0,0233                    | 1,30                             |
| 219335_AT         | ARMCX5        | 2878837         | 0,0049                    | 1,44                             |
| 221482_S_AT       | ARPP-19       | 2864910         | 0,0066                    | 1,37                             |
| 210979_AT         | ASAH1         | 2875068         | 0,0099                    | -1,22                            |
| 201855_S_AT       | ASCIZ         | 2876415         | 0,0167                    | 1,33                             |
| 222103_AT         | ATF1          | 2867401         | 0,0018                    | 1,40                             |
| 202511_S_AT       | ATG5          | 2859664         | 0,0075                    | 1,35                             |
| 202874_S_AT       | ATP6V1C1      | 3027824         | 0,0075                    | 1,46                             |
| 218461_AT         | ATPBD1C       | 2865318         | 0,0206                    | 1,28                             |
| 212461_AT         | AZIN1         | 3028511         | 0,0024                    | 1,30                             |
| 206947_AT         | B3GALT5       | 2874988         | 0,0238                    | -1,23                            |
| 209406_AT         | BAG2          | 2863669         | 0,0176                    | 1,30                             |
| 205084_AT         | BCAP29        | 2863674         | 0,0212                    | 1,45                             |
| 201083_S_AT       | BCLAF1        | 3027732         | 0,0052                    | 1,36                             |
| 208946_S_AT       | BECN1         | 3023891         | 0,0113                    | 1,26                             |
| 202710_AT         | BET1          | 2878105         | 0,0122                    | 1,34                             |
| 221479_S_AT       | BNIP3L        | 2867114         | 0,0173                    | 1,42                             |
| 218597_S_AT       | C10ORF70      | 2861915         | 0,0009                    | 1,38                             |
| 218139_S_AT       | C14ORF108     | 2859318         | 0,0212                    | 1,42                             |
| 202623_AT         | C14ORF11      | 2875341         | 0,0219                    | 1,33                             |
| 203960_S_AT       | C1ORF41       | 2872685         | 0,0059                    | 1,47                             |
| 220543_AT         | C21ORF62      | 2875118         | 0,0071                    | -1,20                            |
| 213312_AT         | C6ORF162      | 2878147         | 0,0111                    | 1,49                             |
| 204215_AT         | C7ORF23       | 2860790         | 0,0215                    | 1,22                             |
| 210967_X_AT       | CACNB1        | 3025172         | 0,0227                    | -1,26                            |
| 213812_S_AT       | CAMKK2        | 2869903         | 0,0137                    | -1,27                            |
| 217196_S_AT       | CAMSAP1L1     | 2890813         | 0,0099                    | 1,32                             |
| 204716_AT         | CCDC6         | 2874183         | 0,0187                    | 1,39                             |
| 210381_S_AT       | CCKBR         | 2860189         | 0,0191                    | -1,29                            |
| 202770_S_AT       | CCNG2         | 2859162         | 0,0213                    | 1,23                             |
| 220671_AT         | CCRN4L        | 2864360         | 0,0199                    | -1,20                            |

|             |              |         |        |       |
|-------------|--------------|---------|--------|-------|
| 200877_AT   | CCT4         | 3024265 | 0,0201 | 1,22  |
| 207278_S_AT | CD209        | 2859925 | 0,0175 | -1,22 |
| 206488_S_AT | CD36         | 2862941 | 0,0237 | 1,62  |
| 206680_AT   | CD5L         | 2859585 | 0,0216 | -1,20 |
| 217881_S_AT | CDC27        | 2861361 | 0,0046 | 1,32  |
| 219343_AT   | CDC37L1      | 2858911 | 0,0204 | 1,40  |
| 209288_S_AT | CDC42EP3     | 3024540 | 0,0136 | 1,38  |
| 206576_S_AT | CEACAM1      | 2858904 | 0,0122 | -1,26 |
| 219036_AT   | CEP70        | 2876017 | 0,0132 | 1,52  |
| 204809_AT   | CLPX         | 3028974 | 0,0036 | 1,32  |
| 210659_AT   | CMKLR1       | 2876215 | 0,0092 | -1,33 |
| 203880_AT   | COX17        | 2869362 | 0,0232 | 1,36  |
| 201940_AT   | CPD          | 2859294 | 0,0047 | 1,40  |
| 201941_AT   | CPD          | 2859294 | 0,0069 | 1,38  |
| 201943_S_AT | CPD          | 2859294 | 0,0082 | 1,33  |
| 202469_S_AT | CPSF6        | 2873577 | 0,0008 | 1,35  |
| 202470_S_AT | CPSF6        | 2873577 | 0,0081 | 1,28  |
| 201990_S_AT | CREBL2       | 2862908 | 0,0189 | 1,32  |
| 208593_X_AT | CRHR1        | 2859512 | 0,0096 | -1,26 |
| 206778_AT   | CRYBB2       | 2879627 | 0,0120 | -1,24 |
| 207531_AT   | CRYGC        | 2873770 | 0,0223 | -1,21 |
| 210228_AT   | CSF2         | 2871241 | 0,0134 | -1,20 |
| 206475_X_AT | CSH2         | 2872831 | 0,0050 | -1,22 |
| 221925_S_AT | CSPP1        | 2868837 | 0,0245 | 1,23  |
| 211126_S_AT | CSRP2        | 2861986 | 0,0153 | 1,41  |
| 212905_AT   | CSTF2T       | 2873293 | 0,0133 | 1,34  |
| 213979_S_AT | CTBP1        | 3025921 | 0,0233 | 1,74  |
| 201219_AT   | CTBP2        | 2866226 | 0,0032 | 1,54  |
| 201219_AT   | CTBP2        | 2862113 | 0,0032 | 1,54  |
| 215377_AT   | CTBP2        | 2866226 | 0,0204 | -1,22 |
| 220017_X_AT | CYP2C9       | 2868633 | 0,0103 | -1,29 |
| 215809_AT   | CYP2D6       | 2871773 | 0,0143 | -1,27 |
| 203261_AT   | DCTN6        | 2862645 | 0,0123 | 1,38  |
| 202938_X_AT | DJ222E13.2   | 2875732 | 0,0211 | -1,29 |
| 202938_X_AT | DJ222E13.2   | 2873882 | 0,0211 | -1,29 |
| 222384_AT   | DKFZP564C196 | 2891649 | 0,0213 | -1,22 |
| 213149_AT   | DLAT         | 2864065 | 0,0047 | 1,41  |
| 202842_S_AT | DNAJB9       | 3025935 | 0,0075 | 1,36  |
| 206032_AT   | DSC3         | 2870065 | 0,0222 | -1,22 |
| 203635_AT   | DSCR3        | 2864990 | 0,0097 | 1,22  |
| 210736_X_AT | DTNA         | 2872265 | 0,0052 | -1,21 |
| 210736_X_AT | DTNA         | 1254649 | 0,0052 | -1,21 |
| 204947_AT   | E2F1         | 3029220 | 0,0233 | -1,23 |
| 217735_S_AT | EIF2AK1      | 2871490 | 0,0109 | 1,39  |
| 213895_AT   | EMP1         | 2872412 | 0,0053 | 1,54  |
| 201324_AT   | EMP1         | 2872412 | 0,0070 | 1,44  |
| 201325_S_AT | EMP1         | 2872412 | 0,0189 | 1,34  |
| 215265_AT   | EMX1         | 2875717 | 0,0054 | -1,23 |
| 204160_S_AT | ENPP4        | 3028435 | 0,0058 | 1,39  |
| 221486_AT   | ENSA         | 2875358 | 0,0233 | 1,23  |
| 204600_AT   | EPHB3        | 2859370 | 0,0106 | -1,24 |
| 202609_AT   | EPS8         | 2864584 | 0,0013 | 1,32  |
| 214372_X_AT | ERN2         | 2860300 | 0,0113 | -1,22 |
| 215552_S_AT | ESR1         | 2859348 | 0,0090 | -1,22 |

|             |           |         |        |       |
|-------------|-----------|---------|--------|-------|
| 211233_X_AT | ESR1      | 2859348 | 0,0173 | -1,23 |
| 205530_AT   | ETFDH     | 2870533 | 0,0116 | 1,34  |
| 219017_AT   | ETNK1     | 2876611 | 0,0213 | 1,43  |
| 206610_S_AT | F11       | 2866065 | 0,0190 | -1,21 |
| 208439_S_AT | FCN2      | 2865662 | 0,0129 | -1,25 |
| 203115_AT   | FECH      | 3024010 | 0,0076 | 1,43  |
| 212373_AT   | FEM1B     | 2869537 | 0,0007 | 1,37  |
| 216492_AT   | FLJ00060  | 3029997 | 0,0063 | -1,20 |
| 219055_AT   | FLJ10379  | 2863785 | 0,0217 | 1,24  |
| 213063_AT   | FLJ11806  | 2878420 | 0,0220 | 1,28  |
| 213679_AT   | FLJ13946  | 2872532 | 0,0205 | 1,52  |
| 221229_S_AT | FLJ20628  | 3027240 | 0,0047 | 1,50  |
| 219029_AT   | FLJ21657  | 2872111 | 0,0080 | 1,55  |
| 207653_AT   | FOXD2     | 2874015 | 0,0227 | -1,27 |
| 210773_S_AT | FPRL1     | 2875536 | 0,0102 | -1,25 |
| 220379_AT   | FSCN3     | 2930296 | 0,0161 | -1,21 |
| 206095_S_AT | FUSIP1    | 3029065 | 0,0246 | 1,44  |
| 208457_AT   | GABRD     | 2860195 | 0,0199 | -1,29 |
| 216854_AT   | GDF11     | 2875990 | 0,0193 | -1,20 |
| 214479_AT   | GFRA3     | 2874764 | 0,0113 | -1,22 |
| 219015_S_AT | GLT28D1   | 2867187 | 0,0135 | 1,53  |
| 209220_AT   | GPC3      | 2873121 | 0,0035 | 1,50  |
| 202849_X_AT | GRK6      | 2870580 | 0,0206 | -1,23 |
| 201912_S_AT | GSPT1     | 3026264 | 0,0045 | 1,29  |
| 210963_S_AT | GYG2      | 3028382 | 0,0175 | -1,22 |
| 214414_X_AT | HBA1      | 2873143 | 0,0065 | 2,24  |
| 204018_X_AT | HBA1      | 2873143 | 0,0223 | 2,30  |
| 211696_X_AT | HBB       | 2871579 | 0,0019 | 1,89  |
| 217232_X_AT | HBB       | 2871579 | 0,0038 | 1,88  |
| 209116_X_AT | HBB       | 2871579 | 0,0039 | 2,29  |
| 204419_X_AT | HBG2      | 2873641 | 0,0008 | 4,79  |
| 204848_X_AT | HBG2      | 2873641 | 0,0026 | 4,21  |
| 213515_X_AT | HBG2      | 2873641 | 0,0033 | 4,25  |
| 202815_S_AT | HEXIM1    | 2870143 | 0,0228 | 1,24  |
| 211326_X_AT | HFE       | 2863133 | 0,0104 | -1,28 |
| 221896_S_AT | HIGD1A    | 3026116 | 0,0142 | 1,34  |
| 202346_AT   | HIP2      | 2874926 | 0,0120 | 1,34  |
| 218946_AT   | HIRIP5    | 2876298 | 0,0023 | 1,43  |
| 204755_X_AT | HLF       | 2874474 | 0,0063 | 1,41  |
| 208493_AT   | HOXA11    | 2878366 | 0,0201 | -1,24 |
| 205601_S_AT | HOXB5     | 2859636 | 0,0113 | -1,27 |
| 207398_AT   | HOXD13    | 2882490 | 0,0192 | -1,25 |
| 39763_AT    | HPX       | 2871491 | 0,0216 | -1,20 |
| 218092_S_AT | HRB       | 2870543 | 0,0249 | 1,40  |
| 218896_S_AT | HSA277841 | 2883927 | 0,0145 | 1,20  |
| 221667_S_AT | HSPB8     | 2870742 | 0,0102 | 1,59  |
| 205133_S_AT | HSPE1     | 3024927 | 0,0119 | 1,34  |
| 209448_AT   | HTATIP2   | 3028635 | 0,0203 | 1,30  |
| 217169_AT   | IGHG3     | 2874859 | 0,0024 | -1,30 |
| 217169_AT   | IGHG3     | 2872592 | 0,0024 | -1,30 |
| 219323_S_AT | IL18BP    | 2862706 | 0,0232 | -1,21 |
| 205468_S_AT | IRF5      | 2873441 | 0,0124 | -1,26 |
| 202351_AT   | ITGAV     | 2865714 | 0,0034 | 1,45  |
| 210197_AT   | ITPK1     | 2875488 | 0,0050 | -1,23 |

|             |           |         |        |       |
|-------------|-----------|---------|--------|-------|
| 216944_S_AT | ITPR1     | 2864989 | 0,0035 | 1,51  |
| 203681_AT   | IVD       | 2876933 | 0,0114 | -1,20 |
| 203204_S_AT | JMJD2A    | 3027640 | 0,0157 | -1,25 |
| 220188_AT   | JPH3      | 3027070 | 0,0083 | -1,25 |
| 37872_AT    | JRK       | 2870071 | 0,0191 | -1,24 |
| 210402_AT   | KCNJ1     | 2876099 | 0,0113 | -1,30 |
| 211304_X_AT | KCNJ5     | 2876076 | 0,0175 | -1,27 |
| 207527_AT   | KCNJ9     | 2869746 | 0,0120 | -1,24 |
| 212200_AT   | KIAA0692  | 2860558 | 0,0140 | 1,30  |
| 212453_AT   | KIAA1279  | 2869436 | 0,0206 | 1,29  |
| 220171_X_AT | KIAA1704  | 2859508 | 0,0019 | 1,29  |
| 220008_AT   | KIAA2002  | 2871262 | 0,0199 | -1,26 |
| 208122_X_AT | KIR2DS3   | 3027997 | 0,0045 | -1,29 |
| 221948_S_AT | KLHL22    | 2862992 | 0,0077 | -1,28 |
| 221985_AT   | KLHL24    | 2872059 | 0,0150 | 1,39  |
| 202056_AT   | KPNA1     | 3029251 | 0,0227 | 1,31  |
| 213680_AT   | KRT6B     | 2860737 | 0,0204 | -1,30 |
| 208071_S_AT | LAIR1     | 3026609 | 0,0130 | -1,37 |
| 206945_AT   | LCT       | 2872951 | 0,0207 | -1,21 |
| 202377_AT   | LEPR      | 3029353 | 0,0032 | 1,35  |
| 202377_AT   | LEPR      | 2878737 | 0,0032 | 1,35  |
| 219699_AT   | LGI2      | 2870050 | 0,0161 | -1,22 |
| 206123_AT   | LLGL1     | 3027868 | 0,0243 | -1,29 |
| 214905_AT   | LOC145899 | 2929129 | 0,0158 | -1,22 |
| 212478_AT   | LOC285074 | 2864928 | 0,0147 | -1,24 |
| 222197_S_AT | LOC388389 | 3028588 | 0,0037 | -1,31 |
| 216209_AT   | LOC400084 | 2923120 | 0,0228 | -1,20 |
| 215196_AT   | LOC91316  | 2876218 | 0,0169 | -1,29 |
| 203007_X_AT | LYPLA1    | 2859287 | 0,0119 | 1,49  |
| 215415_S_AT | LYST      | 3024457 | 0,0042 | -1,27 |
| 209942_X_AT | MAGEA3    | 3027617 | 0,0111 | -1,29 |
| 207581_S_AT | MAGEB4    | 2876026 | 0,0229 | -1,21 |
| 220302_AT   | MAK       | 3025710 | 0,0229 | -1,22 |
| 217971_AT   | MAP2K1IP1 | 3026795 | 0,0154 | 1,33  |
| 209951_S_AT | MAP2K7    | 3027846 | 0,0123 | -1,42 |
| 203930_S_AT | MAPT      | 3027635 | 0,0193 | -1,27 |
| 221047_S_AT | MARK1     | 3023668 | 0,0106 | 1,22  |
| 220397_AT   | MDM1      | 3024315 | 0,0179 | 1,23  |
| 206565_X_AT | MGC22265  | 2860650 | 0,0123 | -1,64 |
| 220352_X_AT | MGC4278   | 2932969 | 0,0250 | -1,27 |
| 209845_AT   | MKRN1     | 2860284 | 0,0044 | 1,29  |
| 203948_S_AT | MPO       | 3028517 | 0,0039 | -1,32 |
| 219321_AT   | MPP5      | 2872829 | 0,0009 | 1,56  |
| 203465_AT   | MRPL19    | 3028341 | 0,0027 | 1,33  |
| 203801_AT   | MRPS14    | 2871211 | 0,0161 | 1,40  |
| 218398_AT   | MRPS30    | 3027197 | 0,0172 | 1,34  |
| 218538_S_AT | MRS2L     | 2868280 | 0,0185 | 1,43  |
| 209421_AT   | MSH2      | 2865471 | 0,0008 | 1,53  |
| 210947_S_AT | MSH3      | 3023789 | 0,0195 | 1,25  |
| 219786_AT   | MTL5      | 2870064 | 0,0054 | -1,30 |
| 203211_S_AT | MTMR2     | 2870602 | 0,0227 | 1,26  |
| 218568_AT   | MULK      | 2867481 | 0,0058 | 1,31  |
| 202959_AT   | MUT       | 3025551 | 0,0180 | 1,38  |
| 217545_AT   | MYH14     | 2864051 | 0,0223 | -1,31 |

|             |         |         |        |       |
|-------------|---------|---------|--------|-------|
| 200027_AT   | NARS    | 2866628 | 0,0241 | 1,24  |
| 219231_AT   | NCOA6IP | 2867862 | 0,0132 | 1,25  |
| 202001_S_AT | NDUFA6  | 2874427 | 0,0216 | 1,34  |
| 203613_S_AT | NDUFB6  | 2875375 | 0,0217 | 1,22  |
| 211914_X_AT | NF1     | 2867288 | 0,0100 | -1,29 |
| 211497_X_AT | NKX3-1  | 3028006 | 0,0200 | -1,20 |
| 218036_X_AT | NMD3    | 2860668 | 0,0167 | 1,30  |
| 207380_X_AT | NOX1    | 2870298 | 0,0050 | -1,20 |
| 217041_AT   | NPTXR   | 3026741 | 0,0217 | -1,24 |
| 209750_AT   | NR1D2   | 2873451 | 0,0096 | 2,01  |
| 207443_AT   | NR2E1   | 3027220 | 0,0238 | -1,21 |
| 209914_S_AT | NRXN1   | 2860726 | 0,0078 | -1,31 |
| 206713_AT   | NTNG1   | 2876108 | 0,0241 | -1,25 |
| 217601_AT   | NUP188  | 2876187 | 0,0169 | -1,22 |
| 210924_AT   | OLFM1   | 3028169 | 0,0098 | -1,24 |
| 212768_S_AT | OLFM4   | 2885477 | 0,0134 | -1,27 |
| 221426_S_AT | OR3A3   | 2876766 | 0,0217 | -1,22 |
| 208507_AT   | OR7C2   | 2890111 | 0,0100 | -1,31 |
| 211212_S_AT | ORC5L   | 2863513 | 0,0196 | 1,20  |
| 201014_S_AT | PAICS   | 2878303 | 0,0147 | 1,30  |
| 219236_AT   | PAQR6   | 2859181 | 0,0202 | -1,21 |
| 221682_S_AT | PCDHGB6 | 2870836 | 0,0110 | -1,25 |
| 216055_AT   | PDGFB   | 2859890 | 0,0124 | -1,28 |
| 220555_S_AT | PDZD7   | 3027772 | 0,0088 | -1,26 |
| 212915_AT   | PDZRN3  | 3026922 | 0,0186 | 1,33  |
| 207009_AT   | PHOX2B  | 2875524 | 0,0017 | -1,30 |
| 219048_AT   | PIGN    | 2866401 | 0,0143 | 1,32  |
| 220566_AT   | PIK3R5  | 2877995 | 0,0230 | -1,21 |
| 207469_S_AT | PIR     | 2866953 | 0,0007 | 1,50  |
| 217581_AT   | PKM2    | 2865851 | 0,0114 | -1,28 |
| 216551_X_AT | PLCG1   | 2863926 | 0,0046 | -1,24 |
| 209209_S_AT | PLEKHC1 | 2862978 | 0,0068 | 1,41  |
| 209210_S_AT | PLEKHC1 | 2862978 | 0,0087 | 1,42  |
| 202619_S_AT | PLOD2   | 2859116 | 0,0061 | 1,50  |
| 209739_S_AT | PNPLA4  | 3027327 | 0,0249 | 1,28  |
| 201409_S_AT | PPP1CB  | 2872157 | 0,0053 | 1,47  |
| 202186_X_AT | PPP2R5A | 2875956 | 0,0119 | -1,25 |
| 209817_AT   | PPP3CB  | 2873978 | 0,0079 | 1,27  |
| 206174_S_AT | PPP6C   | 3026772 | 0,0170 | 1,32  |
| 206248_AT   | PRKCE   | 2873599 | 0,0118 | -1,28 |
| 202178_AT   | PRKCZ   | 2866968 | 0,0080 | 1,64  |
| 213320_AT   | PRMT3   | 2859259 | 0,0028 | 1,59  |
| 217269_S_AT | PRSS7   | 2862842 | 0,0229 | -1,22 |
| 205319_AT   | PSCA    | 2860600 | 0,0107 | -1,31 |
| 204054_AT   | PTEN    | 2869795 | 0,0062 | 1,27  |
| 211711_S_AT | PTEN    | 2869795 | 0,0100 | 1,35  |
| 218967_S_AT | PTER    | 3029906 | 0,0125 | 1,44  |
| 212029_S_AT | PTOV1   | 3028485 | 0,0220 | -1,21 |
| 219654_AT   | PTPLA   | 2916551 | 0,0059 | 1,31  |
| 205171_AT   | PTPN4   | 3025501 | 0,0140 | 1,40  |
| 218984_AT   | PUS7    | 2863499 | 0,0132 | 1,41  |
| 203582_S_AT | RAB4A   | 2865248 | 0,0151 | 1,33  |
| 204199_AT   | RALGPS1 | 2876603 | 0,0218 | 1,46  |
| 211953_S_AT | RANBP5  | 3028158 | 0,0083 | 1,40  |

|             |              |         |        |       |
|-------------|--------------|---------|--------|-------|
| 203096_S_AT | RAPGEF2      | 2875148 | 0,0241 | 1,65  |
| 205080_AT   | RARB         | 3028091 | 0,0183 | 1,34  |
| 210621_S_AT | RASA1        | 2883843 | 0,0168 | 1,31  |
| 206220_S_AT | RASA3        | 2872034 | 0,0124 | -1,25 |
| 210371_S_AT | RBBP4        | 2859599 | 0,0141 | 1,26  |
| 212749_S_AT | RCHY1        | 3029705 | 0,0177 | 1,37  |
| 218344_S_AT | RCOR3        | 2875053 | 0,0066 | 1,43  |
| 205407_AT   | RECK         | 2877640 | 0,0199 | 1,28  |
| 210309_AT   | RECQL5       | 2875915 | 0,0035 | -1,30 |
| 210706_S_AT | RNF24        | 3023922 | 0,0153 | -1,33 |
| 219771_AT   | RP11-321G1.1 | 3027607 | 0,0179 | 1,40  |
| 214089_AT   | RPS8         | 2870923 | 0,0151 | -1,21 |
| 213903_S_AT | RQCD1        | 2869977 | 0,0108 | -1,31 |
| 210716_S_AT | RSN          | 2868501 | 0,0238 | 1,37  |
| 210222_S_AT | RTN1         | 2877431 | 0,0035 | -1,32 |
| 205863_AT   | S100A12      | 2879377 | 0,0146 | 1,27  |
| 213866_AT   | SAMD14       | 3027269 | 0,0245 | -1,41 |
| 215120_S_AT | SAMD4A       | 2863207 | 0,0114 | -1,22 |
| 207413_S_AT | SCN5A        | 2874908 | 0,0230 | -1,22 |
| 217264_S_AT | SCNN1A       | 2869193 | 0,0177 | -1,30 |
| 212589_AT   | SCP2         | 2868627 | 0,0040 | 1,35  |
| 201339_S_AT | SCP2         | 2868627 | 0,0067 | 1,34  |
| 202675_AT   | SDHB         | 2863250 | 0,0224 | 1,23  |
| 209206_AT   | SEC22L1      | 2878470 | 0,0205 | 1,40  |
| 218703_AT   | SEC22L2      | 2876724 | 0,0147 | 1,35  |
| 206442_AT   | SEMG1        | 2875753 | 0,0152 | -1,20 |
| 214720_X_AT | SEPT10       | 2876955 | 0,0020 | 1,41  |
| 220490_AT   | SERINC2      | 3015652 | 0,0168 | -1,25 |
| 220490_AT   | SERINC2      | 2873959 | 0,0168 | -1,25 |
| 208863_S_AT | SFRS1        | 2876932 | 0,0148 | 1,30  |
| 200892_S_AT | SFRS10       | 3025568 | 0,0045 | 1,35  |
| 205751_AT   | SH3GL2       | 2872288 | 0,0116 | 1,96  |
| 211565_AT   | SH3GL3       | 3028316 | 0,0217 | -1,26 |
| 210134_X_AT | SHOX2        | 2865455 | 0,0091 | -1,30 |
| 216537_S_AT | SIGLEC7      | 2859021 | 0,0149 | -1,22 |
| 207185_AT   | SLC10A1      | 3030089 | 0,0218 | -1,21 |
| 207150_AT   | SLC18A3      | 2878103 | 0,0246 | -1,25 |
| 207444_AT   | SLC22A13     | 2869438 | 0,0063 | -1,32 |
| 221920_S_AT | SLC25A37     | 2859171 | 0,0225 | 1,38  |
| 207035_AT   | SLC30A3      | 2958455 | 0,0213 | -1,32 |
| 203164_AT   | SLC33A1      | 3028822 | 0,0051 | 1,49  |
| 203165_S_AT | SLC33A1      | 3028822 | 0,0122 | 1,53  |
| 220924_S_AT | SLC38A2      | 2871776 | 0,0238 | 1,49  |
| 215979_S_AT | SLC7A1       | 2866608 | 0,0065 | -1,31 |
| 206875_S_AT | SLK          | 2865011 | 0,0049 | 1,54  |
| 202527_S_AT | SMAD4        | 2875205 | 0,0200 | 1,42  |
| 218629_AT   | SMO          | 2870194 | 0,0079 | -1,25 |
| 219793_AT   | SNX16        | 3027601 | 0,0028 | 1,29  |
| 205573_S_AT | SNX7         | 2865266 | 0,0235 | 1,31  |
| 212466_AT   | SPRED2       | 2863413 | 0,0105 | -1,25 |
| 202293_AT   | STAG1        | 2875066 | 0,0137 | 1,32  |
| 216451_AT   | STK38        | 2871006 | 0,0047 | -1,34 |
| 212112_S_AT | STX12        | 2859020 | 0,0030 | 1,46  |
| 203457_AT   | STX7         | 2878285 | 0,0110 | 1,21  |

|             |           |         |        |       |
|-------------|-----------|---------|--------|-------|
| 208739_X_AT | SUMO2     | 2876988 | 0,0116 | 1,22  |
| 221914_AT   | SYN1      | 2865731 | 0,0149 | -1,22 |
| 209025_S_AT | SYNCRIP   | 2877460 | 0,0003 | 1,52  |
| 217433_AT   | TACC1     | 2878301 | 0,0034 | -1,33 |
| 210637_AT   | TACR1     | 2858926 | 0,0195 | -1,20 |
| 203715_AT   | TBCE      | 2862667 | 0,0054 | 1,53  |
| 222356_AT   | TBL1Y     | 3028493 | 0,0182 | -1,39 |
| 222377_AT   | TBX10     | 3024310 | 0,0047 | -1,24 |
| 221977_AT   | TBX2      | 2863792 | 0,0168 | -1,20 |
| 215122_AT   | TBX6      | 2869805 | 0,0222 | -1,25 |
| 202824_S_AT | TCEB1     | 2874503 | 0,0214 | 1,41  |
| 216930_AT   | TCF1      | 2869558 | 0,0187 | -1,22 |
| 205513_AT   | TCN1      | 2875372 | 0,0158 | -1,28 |
| 203449_S_AT | TERF1     | 2868610 | 0,0162 | 1,27  |
| 207199_AT   | TERT      | 2875018 | 0,0236 | -1,26 |
| 207199_AT   | TERT      | 1254636 | 0,0236 | -1,26 |
| 218605_AT   | TFB2M     | 2867429 | 0,0028 | 1,41  |
| 217567_AT   | TGM4      | 3028896 | 0,0101 | -1,25 |
| 206260_AT   | TGM4      | 3028896 | 0,0187 | -1,21 |
| 222209_S_AT | TMEM135   | 3025796 | 0,0205 | 1,46  |
| 212623_AT   | TMEM41B   | 2866084 | 0,0124 | 1,38  |
| 221032_S_AT | TMPRSS5   | 2860866 | 0,0217 | -1,21 |
| 206769_AT   | TMSB4Y    | 2874349 | 0,0165 | -1,29 |
| 210405_X_AT | TNFRSF10B | 2878632 | 0,0142 | -1,34 |
| 204933_S_AT | TNFRSF11B | 2865209 | 0,0034 | 2,17  |
| 204485_S_AT | TOM1L1    | 2873817 | 0,0130 | 1,44  |
| 219030_AT   | TPRKB     | 2870183 | 0,0187 | 1,33  |
| 202124_S_AT | TRAK2     | 2864660 | 0,0143 | 1,44  |
| 201398_S_AT | TRAM1     | 2862021 | 0,0119 | 1,27  |
| 203732_AT   | TRIP4     | 2865634 | 0,0149 | 1,30  |
| 220213_AT   | TSHZ2     | 2872374 | 0,0065 | -1,24 |
| 204141_AT   | TUBB2A    | 3015580 | 0,0146 | 1,49  |
| 203690_AT   | TUBGCP3   | 2876562 | 0,0197 | 1,25  |
| 206705_AT   | TULP1     | 2869943 | 0,0119 | -1,21 |
| 202333_S_AT | UBE2B     | 2904348 | 0,0129 | 1,36  |
| 211763_S_AT | UBE2B     | 2904348 | 0,0133 | 1,28  |
| 209142_S_AT | UBE2G1    | 2869028 | 0,0228 | 1,49  |
| 209142_S_AT | UBE2G1    | 1254644 | 0,0228 | 1,49  |
| 213822_S_AT | UBE3B     | 3025706 | 0,0185 | 1,51  |
| 212006_AT   | UBXD2     | 2861909 | 0,0250 | 1,35  |
| 215983_S_AT | UBXD6     | 2873575 | 0,0138 | 1,34  |
| 205480_S_AT | UGP2      | 2863192 | 0,0139 | 1,27  |
| 204062_S_AT | ULK2      | 2859121 | 0,0119 | 1,24  |
| 220507_S_AT | UPB1      | 2874110 | 0,0077 | -1,35 |
| 211184_S_AT | USH1C     | 3026923 | 0,0061 | -1,29 |
| 205137_X_AT | USH1C     | 3026923 | 0,0178 | -1,33 |
| 216964_AT   | USP22     | 2873033 | 0,0183 | -1,34 |
| 203869_AT   | USP46     | 3024658 | 0,0059 | 1,37  |
| 207376_AT   | VENTX     | 2866473 | 0,0211 | -1,21 |
| 211598_X_AT | VIPR2     | 3025109 | 0,0210 | -1,21 |
| 217837_S_AT | VPS24     | 3030011 | 0,0233 | 1,25  |
| 201807_AT   | VPS26A    | 2870985 | 0,0098 | 1,25  |
| 212342_AT   | YIPF6     | 2875768 | 0,0100 | 1,35  |
| 219312_S_AT | ZBTB10    | 3028114 | 0,0075 | 1,37  |

|             |        |         |        |       |
|-------------|--------|---------|--------|-------|
| 207920_X_AT | ZFX    | 2868221 | 0,0173 | 1,26  |
| 206900_X_AT | ZNF253 | 2873134 | 0,0113 | 1,32  |
| 212742_AT   | ZNF364 | 3029815 | 0,0011 | 1,41  |
| 220616_AT   | ZNF384 | 2872377 | 0,0134 | -1,30 |
