# Supplementary material
Source: PubMed Central journal article supplement (PMC2635764)
Supplement: 0812591106_ST4_PDF.pdf [file 0812591106_ST4_PDF.pdf]

**Table S4. Comparison of trascryptomes of 8 GC heterozygous and 8 GG homozygous PTC cases**

| <b>Affymetrix</b> | <b>Symbol</b> | <b>DAVID ID</b> | <b>Parametric p-value</b> | <b>Ratio of geom means GC/GG</b> |
|-------------------|---------------|-----------------|---------------------------|----------------------------------|
| 209246_AT         | ABCF2         | 2858377         | 0,0092                    | -1,28                            |
| 213805_AT         | ABHD5         | 2876418         | 0,0163                    | 1,26                             |
| 209028_S_AT       | ABI1          | 2877282         | 0,0090                    | 1,39                             |
| 210461_S_AT       | ABLIM1        | 3026176         | 0,0052                    | -1,34                            |
| 202002_AT         | ACAA2         | 2863791         | 0,0026                    | -1,28                            |
| 202422_S_AT       | ACSL4         | 2870000         | 0,0062                    | 1,29                             |
| 202666_S_AT       | ACTL6A        | 2860289         | 0,0081                    | 1,48                             |
| 200729_S_AT       | ACTR2         | 2860647         | 0,0014                    | 1,46                             |
| 200996_AT         | ACTR3         | 2860568         | 0,0006                    | 1,48                             |
| 213102_AT         | ACTR3         | 2860568         | 0,0025                    | 1,48                             |
| 213101_S_AT       | ACTR3         | 2860568         | 0,0180                    | 1,33                             |
| 202604_X_AT       | ADAM10        | 2865096         | 0,0189                    | 1,34                             |
| 209979_AT         | ADARB1        | 2864947         | 0,0188                    | -1,30                            |
| 211489_AT         | ADRA1A        | 2876030         | 0,0086                    | -1,24                            |
| 208544_AT         | ADRA2B        | 2868202         | 0,0023                    | -1,31                            |
| 206128_AT         | ADRA2C        | 2877966         | 0,0077                    | -1,29                            |
| 215451_S_AT       | AFF1          | 2876304         | 0,0070                    | -1,31                            |
| 203566_S_AT       | AGL           | 2864577         | 0,0233                    | 1,51                             |
| 205401_AT         | AGPS          | 3029922         | 0,0224                    | 1,23                             |
| 219977_AT         | AIPL1         | 2864707         | 0,0054                    | -1,21                            |
| 205623_AT         | ALDH3A1       | 3024346         | 0,0087                    | -1,21                            |
| 203609_S_AT       | ALDH5A1       | 3016995         | 0,0037                    | -1,27                            |
| 207140_AT         | ALPI          | 2859590         | 0,0075                    | -1,21                            |
| 201197_AT         | AMD1          | 3026948         | 0,0154                    | 1,22                             |
| 219437_S_AT       | ANKRD11       | 3026794         | 0,0246                    | -1,23                            |
| 205265_S_AT       | APEG1         | 2873424         | 0,0147                    | -1,25                            |
| 201687_S_AT       | API5          | 2859944         | 0,0068                    | 1,31                             |
| 205568_AT         | AQP9          | 2875756         | 0,0114                    | 1,39                             |
| 217348_X_AT       | ARHGEF15      | 2875606         | 0,0186                    | -1,20                            |
| 212614_AT         | ARID5B        | 3026949         | 0,0212                    | 1,72                             |
| 207631_AT         | ARL17P1       | 2865600         | 0,0148                    | -1,27                            |
| 203586_S_AT       | ARL4D         | 2875115         | 0,0134                    | -1,35                            |
| 218185_S_AT       | ARMC1         | 2860283         | 0,0058                    | 1,41                             |
| 213513_X_AT       | ARPC2         | 2876571         | 0,0105                    | 1,38                             |
| 208736_AT         | ARPC3         | 3028189         | 0,0004                    | 1,38                             |
| 211963_S_AT       | ARPC5         | 2870587         | 0,0075                    | 1,31                             |
| 217516_X_AT       | ARVCF         | 2868585         | 0,0045                    | -1,28                            |
| 212815_AT         | ASCC3         | 2862823         | 0,0095                    | 1,45                             |
| 217389_S_AT       | ATF5          | 2860082         | 0,0049                    | -1,32                            |
| 215716_S_AT       | ATP2B1        | 2862999         | 0,0125                    | 1,36                             |
| 209935_AT         | ATP2C1        | 2874025         | 0,0007                    | 1,35                             |
| 207546_AT         | ATP4B         | 3027026         | 0,0006                    | -1,29                            |
| 200096_S_AT       | ATP6V0E       | 2863243         | 0,0102                    | 1,23                             |
| 210507_S_AT       | AVIL          | 2876529         | 0,0161                    | -1,20                            |
| 211379_X_AT       | B3GALT3       | 2877998         | 0,0043                    | 1,51                             |
| 218899_S_AT       | BAALC         | 2857964         | 0,0182                    | 1,27                             |
| 204194_AT         | BACH1         | 2862997         | 0,0083                    | 1,35                             |
| 206083_AT         | BAI1          | 2869651         | 0,0128                    | -1,26                            |

|             |           |         |        |       |
|-------------|-----------|---------|--------|-------|
| 216356_X_AT | BAIAP3    | 3029030 | 0,0247 | -1,22 |
| 205263_AT   | BCL10     | 2869521 | 0,0209 | 1,27  |
| 207005_S_AT | BCL2      | 2858063 | 0,0121 | -1,20 |
| 207004_AT   | BCL2      | 2858063 | 0,0246 | -1,22 |
| 205681_AT   | BCL2A1    | 2863503 | 0,0096 | 2,32  |
| 214643_X_AT | BIN1      | 3030118 | 0,0193 | -1,27 |
| 209308_S_AT | BNIP2     | 2862927 | 0,0239 | 1,22  |
| 203502_AT   | BPGM      | 2873385 | 0,0188 | 1,38  |
| 215676_AT   | BRF1      | 3027063 | 0,0129 | -1,22 |
| 215010_S_AT | BRSK2     | 3026777 | 0,0188 | -1,23 |
| 200921_S_AT | BTG1      | 3029079 | 0,0104 | 1,47  |
| 200777_S_AT | BZW1      | 2875652 | 0,0004 | 1,34  |
| 200776_S_AT | BZW1      | 2896145 | 0,0184 | 1,34  |
| 200776_S_AT | BZW1      | 2875652 | 0,0184 | 1,34  |
| 52164_AT    | C11ORF24  | 2862925 | 0,0202 | 1,30  |
| 218852_AT   | C14ORF10  | 2865144 | 0,0055 | 1,39  |
| 221709_S_AT | C14ORF131 | 2943060 | 0,0242 | -1,22 |
| 212460_AT   | C14ORF147 | 2870761 | 0,0001 | 1,74  |
| 221907_AT   | C14ORF172 | 2859723 | 0,0009 | -1,28 |
| 212644_S_AT | C14ORF32  | 2872754 | 0,0151 | 1,39  |
| 218183_AT   | C16ORF5   | 2874943 | 0,0013 | -1,35 |
| 214296_X_AT | C19ORF36  | 2865200 | 0,0175 | -1,39 |
| 219283_AT   | C1GALT1C1 | 2874043 | 0,0084 | 1,30  |
| 220235_S_AT | C1ORF103  | 2872663 | 0,0196 | 1,22  |
| 212371_AT   | C1ORF121  | 2878034 | 0,0176 | 1,27  |
| 221272_S_AT | C1ORF21   | 3024463 | 0,0017 | -1,34 |
| 203960_S_AT | C1ORF41   | 2872685 | 0,0204 | 1,29  |
| 215490_AT   | C1ORF69   | 2867538 | 0,0234 | -1,20 |
| 217851_S_AT | C20ORF45  | 2858951 | 0,0094 | 1,48  |
| 216828_AT   | C20ORF80  | 2864978 | 0,0217 | -1,24 |
| 203996_S_AT | C21ORF2   | 2864850 | 0,0064 | -1,25 |
| 217883_AT   | C2ORF25   | 2864438 | 0,0227 | 1,22  |
| 219065_S_AT | C2ORF4    | 3025807 | 0,0182 | 1,47  |
| 219114_AT   | C3ORF18   | 3027043 | 0,0169 | -1,20 |
| 215746_AT   | C4ORF9    | 3024938 | 0,0076 | -1,23 |
| 207998_S_AT | CACNA1D   | 2860135 | 0,0024 | -1,30 |
| 210185_AT   | CACNB1    | 3025172 | 0,0025 | -1,41 |
| 215198_S_AT | CALD1     | 2866039 | 0,0109 | -1,37 |
| 220414_AT   | CALML5    | 2876322 | 0,0187 | -1,22 |
| 200755_S_AT | CALU      | 3023968 | 0,0095 | 1,31  |
| 213276_AT   | CAMK2B    | 2878398 | 0,0114 | -1,26 |
| 219365_S_AT | CAMKV     | 2875786 | 0,0061 | -1,21 |
| 208839_S_AT | CAND1     | 2866647 | 0,0092 | 1,27  |
| 213547_AT   | CAND2     | 2882451 | 0,0162 | -1,43 |
| 200625_S_AT | CAP1      | 2860437 | 0,0215 | 1,29  |
| 215097_AT   | CAPZB     | 2915128 | 0,0094 | -1,23 |
| 209310_S_AT | CASP4     | 2866688 | 0,0207 | 1,45  |
| 213373_S_AT | CASP8     | 2878796 | 0,0231 | 1,40  |
| 200037_S_AT | CBX3      | 2870381 | 0,0049 | 1,28  |
| 202048_S_AT | CBX6      | 2868990 | 0,0204 | -1,21 |
| 209698_AT   | CCHCR1    | 2875180 | 0,0096 | -1,21 |
| 210381_S_AT | CCKBR     | 2860189 | 0,0173 | -1,23 |
| 202769_AT   | CCNG2     | 2859162 | 0,0142 | 1,26  |
| 203213_AT   | CDC2      | 2871099 | 0,0128 | 1,32  |

|             |               |         |        |       |
|-------------|---------------|---------|--------|-------|
| 208728_S_AT | CDC42         | 2943049 | 0,0101 | 1,29  |
| 215296_AT   | CDC42BPA      | 3029918 | 0,0195 | -1,25 |
| 206328_AT   | CDH15         | 2874579 | 0,0104 | -1,28 |
| 214353_AT   | CELSR1        | 2871346 | 0,0037 | -1,24 |
| 218542_AT   | CEP55         | 2871896 | 0,0119 | 1,35  |
| 211920_AT   | CFB           | 2865358 | 0,0076 | -1,27 |
| 210563_X_AT | CFLAR         | 2870939 | 0,0156 | 1,35  |
| 206932_AT   | CH25H         | 3029097 | 0,0142 | 1,96  |
| 203975_S_AT | CHAF1A        | 2859135 | 0,0174 | -1,21 |
| 207868_AT   | CHRNA2        | 2866659 | 0,0089 | -1,22 |
| 204170_S_AT | CKS2          | 2871009 | 0,0004 | 2,11  |
| 221961_AT   | CLCN7         | 2859635 | 0,0098 | -1,28 |
| 214598_AT   | CLDN8         | 2865742 | 0,0008 | 3,17  |
| 210769_AT   | CNGB1         | 2875302 | 0,0128 | -1,23 |
| 211141_S_AT | CNOT3         | 3028232 | 0,0204 | -1,25 |
| 202164_S_AT | CNOT8         | 2874009 | 0,0156 | 1,25  |
| 202312_S_AT | COL1A1        | 2870807 | 0,0082 | -1,31 |
| 213379_AT   | COQ2          | 3026756 | 0,0170 | 1,34  |
| 201943_S_AT | CPD           | 2859294 | 0,0235 | 1,62  |
| 215700_X_AT | CPNE6         | 2876770 | 0,0035 | -1,23 |
| 219707_AT   | CPNE7         | 2872850 | 0,0235 | -1,21 |
| 205843_X_AT | CRAT          | 3026009 | 0,0166 | -1,27 |
| 211808_S_AT | CREBBP        | 2876572 | 0,0165 | -1,26 |
| 219913_S_AT | CRNKL1        | 2872090 | 0,0077 | 1,29  |
| 207531_AT   | CRYGC         | 2873770 | 0,0120 | -1,23 |
| 204619_S_AT | CSPG2         | 2860177 | 0,0130 | 2,46  |
| 215646_S_AT | CSPG2         | 2860177 | 0,0164 | 3,00  |
| 211571_S_AT | CSPG2         | 2860177 | 0,0217 | 2,69  |
| 205143_AT   | CSPG3         | 2874059 | 0,0191 | -1,21 |
| 202213_S_AT | CUL4B         | 2918629 | 0,0091 | 1,28  |
| 203139_AT   | DAPK1         | 2872715 | 0,0067 | 1,52  |
| 219149_X_AT | DBR1          | 2865822 | 0,0215 | 1,22  |
| 219116_S_AT | DCUN1D2       | 2870550 | 0,0024 | -1,25 |
| 218172_S_AT | DERL1         | 2862503 | 0,0140 | 1,49  |
| 221191_AT   | DKFZP434A0131 | 3023896 | 0,0158 | -1,25 |
| 212568_S_AT | DLAT          | 2864065 | 0,0237 | 1,47  |
| 208810_AT   | DNAJB6        | 2865520 | 0,0133 | 1,25  |
| 202843_AT   | DNAJB9        | 3025935 | 0,0017 | 1,37  |
| 202842_S_AT | DNAJB9        | 3025935 | 0,0214 | 1,24  |
| 215840_AT   | DNHD3         | 2864565 | 0,0168 | -1,21 |
| 205003_AT   | DOCK4         | 3028673 | 0,0213 | 1,56  |
| 214865_AT   | DOT1L         | 2875659 | 0,0146 | -1,24 |
| 209187_AT   | DR1           | 2871017 | 0,0189 | 1,36  |
| 204751_X_AT | DSC2          | 3029185 | 0,0034 | 1,59  |
| 217901_AT   | DSG2          | 2877969 | 0,0169 | 1,28  |
| 204954_S_AT | DYRK1B        | 2875519 | 0,0058 | -1,34 |
| 204947_AT   | E2F1          | 3029220 | 0,0009 | -1,33 |
| 210132_AT   | EFNA3         | 2867528 | 0,0057 | -1,24 |
| 207301_AT   | EFNA5         | 2878249 | 0,0099 | -1,21 |
| 200595_S_AT | EIF3S10       | 3024079 | 0,0204 | 1,26  |
| 211787_S_AT | EIF4A1        | 3026908 | 0,0106 | 1,22  |
| 206338_AT   | ELAVL3        | 3027657 | 0,0098 | -1,26 |
| 208788_AT   | ELOVL5        | 2859012 | 0,0151 | 1,40  |
| 204398_S_AT | EML2          | 3025027 | 0,0180 | -1,24 |

|             |          |         |        |       |
|-------------|----------|---------|--------|-------|
| 201324_AT   | EMP1     | 2872412 | 0,0015 | 1,56  |
| 206710_S_AT | EPB41L3  | 2870648 | 0,0186 | 1,90  |
| 215804_AT   | EPHA1    | 2889390 | 0,0170 | -1,25 |
| 217887_S_AT | EPS15    | 2860348 | 0,0103 | 1,31  |
| 217190_X_AT | ESR1     | 2859348 | 0,0203 | -1,27 |
| 206329_AT   | EXTL1    | 3027822 | 0,0204 | -1,21 |
| 203989_X_AT | F2R      | 2869902 | 0,0195 | 1,59  |
| 213506_AT   | F2RL1    | 2871193 | 0,0186 | 1,55  |
| 215719_X_AT | FAS      | 2877006 | 0,0152 | 1,86  |
| 217006_X_AT | FASN     | 3027717 | 0,0172 | -1,20 |
| 202766_S_AT | FBN1     | 2875968 | 0,0140 | 1,63  |
| 221257_X_AT | FBXO38   | 3028737 | 0,0082 | 1,25  |
| 220164_S_AT | FBXO40   | 2864806 | 0,0240 | -1,36 |
| 206986_AT   | FGF18    | 2870208 | 0,0143 | -1,29 |
| 202949_S_AT | FHL2     | 3026798 | 0,0190 | 1,57  |
| 216434_AT   | FLJ20699 | 2865045 | 0,0181 | -1,31 |
| 218842_AT   | FLJ21908 | 2864466 | 0,0037 | 1,33  |
| 220583_AT   | FLJ22596 | 2864507 | 0,0110 | -1,25 |
| 218454_AT   | FLJ22662 | 2859840 | 0,0023 | 2,02  |
| 214312_AT   | FOXA2    | 2958139 | 0,0055 | -1,24 |
| 203698_S_AT | FRZB     | 2860141 | 0,0216 | 1,42  |
| 203697_AT   | FRZB     | 2860141 | 0,0222 | 1,60  |
| 213594_X_AT | FUSIP1   | 3029065 | 0,0001 | 1,52  |
| 204299_AT   | FUSIP1   | 3029065 | 0,0025 | 1,32  |
| 217696_AT   | FUT7     | 2875482 | 0,0147 | -1,27 |
| 203987_AT   | FZD6     | 2877020 | 0,0132 | 1,75  |
| 209415_AT   | FZR1     | 3028001 | 0,0246 | -1,25 |
| 201503_AT   | G3BP     | 3023884 | 0,0007 | 1,35  |
| 208841_S_AT | G3BP2    | 2870505 | 0,0211 | 1,22  |
| 201722_S_AT | GALNT1   | 2860764 | 0,0005 | 1,58  |
| 201724_S_AT | GALNT1   | 2860764 | 0,0086 | 1,45  |
| 209710_AT   | GATA2    | 2869627 | 0,0075 | -1,34 |
| 210002_AT   | GATA6    | 2874062 | 0,0200 | 1,70  |
| 203765_AT   | GCA      | 2863707 | 0,0023 | 1,53  |
| 205351_AT   | GGCX     | 2876176 | 0,0244 | 1,27  |
| 208590_X_AT | GJA3     | 2865397 | 0,0013 | -1,32 |
| 204222_S_AT | GLIPR1   | 2861498 | 0,0227 | 1,57  |
| 209276_S_AT | GLRX     | 2871317 | 0,0097 | 1,63  |
| 200947_S_AT | GLUD2    | 3027630 | 0,0118 | 1,25  |
| 202543_S_AT | GMFB     | 2863954 | 0,0079 | 1,59  |
| 201180_S_AT | GNAI3    | 2869414 | 0,0180 | 1,27  |
| 201179_S_AT | GNAI3    | 2869414 | 0,0247 | 1,26  |
| 213650_AT   | GOLGA8B  | 3028807 | 0,0096 | -1,55 |
| 213650_AT   | GOLGA8B  | 3024675 | 0,0096 | -1,55 |
| 208473_S_AT | GP2      | 3026541 | 0,0061 | -1,22 |
| 206883_X_AT | GP9      | 2877225 | 0,0151 | -1,27 |
| 202755_S_AT | GPC1     | 2871253 | 0,0133 | -1,32 |
| 210999_S_AT | GRB10    | 3023951 | 0,0118 | -1,42 |
| 218468_S_AT | GREM1    | 2863589 | 0,0141 | 2,03  |
| 218469_AT   | GREM1    | 2863589 | 0,0175 | 2,22  |
| 217509_X_AT | GRIK5    | 3027250 | 0,0168 | -1,20 |
| 202044_AT   | GRLF1    | 2875019 | 0,0007 | -1,43 |
| 215438_X_AT | GSPT1    | 3026264 | 0,0005 | 1,34  |
| 201912_S_AT | GSPT1    | 3026264 | 0,0007 | 1,42  |

|             |           |         |        |       |
|-------------|-----------|---------|--------|-------|
| 205276_S_AT | GTPBP1    | 3026491 | 0,0025 | -1,25 |
| 205275_AT   | GTPBP1    | 3026491 | 0,0155 | -1,21 |
| 220801_S_AT | HAO2      | 2874284 | 0,0138 | -1,25 |
| 209718_AT   | HCAP-H2   | 3028610 | 0,0198 | -1,21 |
| 202473_X_AT | HCFC1     | 2877680 | 0,0097 | -1,20 |
| 215973_AT   | HCG4P6    | 2874577 | 0,0032 | -1,21 |
| 201833_AT   | HDAC2     | 2860262 | 0,0043 | 1,24  |
| 216693_X_AT | HDGFRP3   | 3030088 | 0,0071 | 1,41  |
| 203903_S_AT | HEPH      | 2863950 | 0,0062 | 2,13  |
| 214188_AT   | HEXIM1    | 2870143 | 0,0013 | -1,62 |
| 202232_S_AT | HFL-B5    | 2858976 | 0,0087 | 1,37  |
| 219719_AT   | HIGD1B    | 2871089 | 0,0151 | -1,28 |
| 202346_AT   | HIP2      | 2874926 | 0,0202 | 1,25  |
| 222305_AT   | HK2       | 2864607 | 0,0069 | -1,31 |
| 214832_AT   | HNF4A     | 3028347 | 0,0149 | -1,20 |
| 204112_S_AT | HNMT      | 2859141 | 0,0005 | 1,91  |
| 219976_AT   | HOOK1     | 2869766 | 0,0145 | -1,22 |
| 213147_AT   | HOXA10    | 2860537 | 0,0206 | -1,31 |
| 218092_S_AT | HRB       | 2870543 | 0,0014 | 1,41  |
| 206863_X_AT | HRK       | 2862661 | 0,0034 | -1,21 |
| 206839_AT   | HS747E2A  | 2861983 | 0,0235 | -1,28 |
| 218971_S_AT | HSPC049   | 2878166 | 0,0214 | -1,21 |
| 219979_S_AT | HSPC138   | 3027345 | 0,0054 | 1,43  |
| 221458_AT   | HTR1F     | 2906656 | 0,0159 | -1,27 |
| 203089_S_AT | HTRA2     | 2862909 | 0,0109 | 1,25  |
| 210970_S_AT | IBTK      | 2859382 | 0,0093 | 1,33  |
| 211676_S_AT | IFNGR1    | 2865838 | 0,0015 | 1,33  |
| 202727_S_AT | IFNGR1    | 2865838 | 0,0054 | 1,32  |
| 207817_AT   | IFNW1     | 2871357 | 0,0100 | -1,26 |
| 214267_S_AT | IGSF4C    | 2865310 | 0,0069 | -1,22 |
| 202948_AT   | IL1R1     | 2865923 | 0,0062 | 1,55  |
| 211506_S_AT | IL8       | 2871050 | 0,0122 | 1,99  |
| 212210_AT   | INT1      | 2859533 | 0,0198 | -1,26 |
| 206493_AT   | ITGA2B    | 3025669 | 0,0077 | -1,32 |
| 216331_AT   | ITGA7     | 2873203 | 0,0068 | -1,39 |
| 216023_AT   | JMJD2B    | 3024642 | 0,0047 | -1,20 |
| 206734_AT   | JRKL      | 2865277 | 0,0220 | 1,26  |
| 211072_X_AT | K-ALPHA-1 | 2864844 | 0,0211 | 1,26  |
| 220802_AT   | KCNH4     | 2866605 | 0,0055 | -1,28 |
| 208404_X_AT | KCNJ5     | 2876076 | 0,0063 | -1,22 |
| 218823_S_AT | KCTD9     | 3024471 | 0,0121 | 1,52  |
| 200700_S_AT | KDEL2     | 3023841 | 0,0213 | 1,34  |
| 212264_S_AT | KIAA0261  | 2862980 | 0,0126 | 1,24  |
| 203049_S_AT | KIAA0372  | 2869693 | 0,0237 | 1,40  |
| 213157_S_AT | KIAA0523  | 2865810 | 0,0054 | -1,30 |
| 212311_AT   | KIAA0746  | 2877691 | 0,0154 | 1,98  |
| 212314_AT   | KIAA0746  | 2877691 | 0,0231 | 2,05  |
| 212633_AT   | KIAA0776  | 2870178 | 0,0096 | 1,36  |
| 207637_AT   | KIAA0789  | 2864561 | 0,0120 | -1,22 |
| 216345_AT   | KIAA0913  | 2873446 | 0,0186 | -1,28 |
| 221802_S_AT | KIAA1598  | 2868197 | 0,0172 | 1,35  |
| 214964_AT   | KIAA1856  | 2863949 | 0,0055 | -1,38 |
| 209244_S_AT | KIF1C     | 3027844 | 0,0137 | -1,35 |
| 203087_S_AT | KIF2      | 2877986 | 0,0041 | 1,37  |

|             |           |         |        |       |
|-------------|-----------|---------|--------|-------|
| 217315_S_AT | KLK13     | 2865039 | 0,0192 | -1,24 |
| 201088_AT   | KPNA2     | 2874955 | 0,0090 | 1,68  |
| 211762_S_AT | KPNA2     | 2874955 | 0,0116 | 1,41  |
| 221502_AT   | KPNA3     | 2884102 | 0,0117 | 1,31  |
| 204009_S_AT | KRAS      | 2859340 | 0,0032 | 1,34  |
| 202647_S_AT | KRAS      | 2859340 | 0,0124 | 1,47  |
| 216821_AT   | KRT8      | 3028552 | 0,0066 | -1,26 |
| 216821_AT   | KRT8      | 2925551 | 0,0066 | -1,26 |
| 207146_AT   | KRTHA2    | 2872846 | 0,0176 | -1,22 |
| 216076_AT   | L3MBTL    | 2875955 | 0,0173 | -1,22 |
| 214216_S_AT | LARP5     | 2877331 | 0,0053 | -1,30 |
| 218922_S_AT | LASS4     | 3026444 | 0,0101 | -1,46 |
| 201795_AT   | LBR       | 2859600 | 0,0181 | 1,41  |
| 201595_S_AT | LEREPO4   | 2864310 | 0,0067 | 1,27  |
| 207872_S_AT | LILRA1    | 3025847 | 0,0124 | -1,31 |
| 207872_S_AT | LILRA1    | 2910158 | 0,0124 | -1,31 |
| 200706_S_AT | LITAF     | 2862736 | 0,0138 | 1,38  |
| 200704_AT   | LITAF     | 2862736 | 0,0165 | 1,29  |
| 217514_AT   | LOC147343 | 2927759 | 0,0008 | -1,31 |
| 217350_AT   | LOC160313 | 2866926 | 0,0151 | -1,20 |
| 211915_S_AT | LOC388579 | 3029709 | 0,0177 | -1,20 |
| 211915_S_AT | LOC388579 | 3028999 | 0,0177 | -1,20 |
| 211915_S_AT | LOC388579 | 3005417 | 0,0177 | -1,20 |
| 211915_S_AT | LOC388579 | 2858581 | 0,0177 | -1,20 |
| 215625_AT   | LOC401131 | 2921782 | 0,0195 | -1,22 |
| 218577_AT   | LRRRC40   | 3025645 | 0,0131 | 1,33  |
| 222231_S_AT | LRRRC59   | 2876253 | 0,0160 | 1,29  |
| 201861_S_AT | LRRFIP1   | 2875069 | 0,0229 | -1,22 |
| 202904_S_AT | LSM5      | 2886759 | 0,0138 | 1,27  |
| 202018_S_AT | LTF       | 2859499 | 0,0017 | 1,90  |
| 218729_AT   | LXN       | 2871304 | 0,0149 | 1,44  |
| 212449_S_AT | LYPLA1    | 2859287 | 0,0029 | 1,68  |
| 203362_S_AT | MAD2L1    | 2873819 | 0,0083 | 1,38  |
| 214180_AT   | MAN1C1    | 2878288 | 0,0221 | -1,34 |
| 203837_AT   | MAP3K5    | 2865683 | 0,0082 | 1,58  |
| 203553_S_AT | MAP4K5    | 2869901 | 0,0168 | 1,32  |
| 211500_AT   | MAPK11    | 3028087 | 0,0072 | -1,28 |
| 213014_AT   | MAPK8IP1  | 2875552 | 0,0124 | -1,22 |
| 203842_S_AT | MAPRE3    | 3027775 | 0,0182 | -1,24 |
| 215908_AT   | MARCH6    | 2867886 | 0,0232 | -1,22 |
| 201669_S_AT | MARCKS    | 2881584 | 0,0225 | 1,47  |
| 213749_AT   | MASP1     | 2867871 | 0,0171 | -1,22 |
| 215660_S_AT | MAST2     | 2877844 | 0,0085 | -1,26 |
| 210958_S_AT | MAST4     | 3026647 | 0,0157 | -1,24 |
| 206905_S_AT | MATN1     | 2866685 | 0,0076 | -1,30 |
| 209580_S_AT | MBD4      | 2887013 | 0,0009 | 1,44  |
| 217843_S_AT | MED4      | 2872253 | 0,0037 | 1,28  |
| 207968_S_AT | MEF2C     | 2863299 | 0,0085 | -1,31 |
| 203102_S_AT | MGAT2     | 2873734 | 0,0005 | 1,58  |
| 211061_S_AT | MGAT2     | 2873734 | 0,0076 | 1,34  |
| 210483_AT   | MGC31957  | 2869221 | 0,0084 | -1,25 |
| 221477_S_AT | MGC5618   | 2933076 | 0,0184 | 1,50  |
| 221559_S_AT | MIS12     | 3026584 | 0,0102 | 1,24  |
| 204580_AT   | MMP12     | 2877862 | 0,0160 | 1,92  |

|             |         |         |        |       |
|-------------|---------|---------|--------|-------|
| 207013_S_AT | MMP16   | 2871780 | 0,0182 | -1,24 |
| 204259_AT   | MMP7    | 2868194 | 0,0057 | 3,54  |
| 203936_S_AT | MMP9    | 2865726 | 0,0176 | 1,68  |
| 201298_S_AT | MOBK1B  | 2862954 | 0,0064 | 1,30  |
| 201297_S_AT | MOBK1B  | 2862954 | 0,0230 | 1,27  |
| 219852_S_AT | MORN1   | 2864032 | 0,0016 | -1,36 |
| 218853_S_AT | MOSPD1  | 2874345 | 0,0154 | 1,27  |
| 207984_S_AT | MPP2    | 3029510 | 0,0189 | -1,28 |
| 210087_S_AT | MPZL1   | 2867721 | 0,0087 | 1,48  |
| 218049_S_AT | MRPL13  | 3025980 | 0,0215 | 1,27  |
| 217395_AT   | MT4     | 2889150 | 0,0152 | -1,25 |
| 203208_S_AT | MTFR1   | 2862709 | 0,0041 | 1,25  |
| 203211_S_AT | MTMR2   | 2870602 | 0,0017 | 1,39  |
| 207424_AT   | MYF5    | 2866595 | 0,0122 | -1,31 |
| 206657_S_AT | MYOD1   | 2864967 | 0,0101 | -1,21 |
| 207282_S_AT | MYOG    | 3028051 | 0,0247 | -1,21 |
| 221242_AT   | NA      | 3029245 | 0,0065 | -1,23 |
| 208145_AT   | NA      | 2878684 | 0,0092 | -1,27 |
| 221071_AT   | NA      | 2867128 | 0,0127 | -1,28 |
| 216729_AT   | NA      | 2930399 | 0,0134 | -1,28 |
| 217079_AT   | NA      | 2878656 | 0,0197 | -1,21 |
| 217079_AT   | NA      | 2877678 | 0,0197 | -1,21 |
| 81811_AT    | NA      | 2862045 | 0,0200 | -1,24 |
| 218231_AT   | NAGK    | 3026600 | 0,0249 | 1,27  |
| 209520_S_AT | NCBP1   | 2867335 | 0,0021 | 1,40  |
| 207860_AT   | NCR1    | 2877502 | 0,0070 | -1,23 |
| 205054_AT   | NEB     | 3024072 | 0,0202 | -3,35 |
| 202149_AT   | NEDD9   | 2878892 | 0,0242 | 1,71  |
| 211086_X_AT | NEK1    | 2860097 | 0,0066 | -1,28 |
| 201830_S_AT | NET1    | 2866321 | 0,0021 | 2,27  |
| 201829_AT   | NET1    | 2866321 | 0,0183 | 1,57  |
| 204702_S_AT | NFE2L3  | 2874192 | 0,0116 | 1,78  |
| 218128_AT   | NFYB    | 2862983 | 0,0098 | 1,32  |
| 207451_AT   | NKX2-8  | 3027134 | 0,0175 | -1,21 |
| 206477_S_AT | NOVA2   | 2872848 | 0,0136 | -1,23 |
| 209957_S_AT | NPPA    | 3027787 | 0,0119 | -1,23 |
| 212709_AT   | NUP160  | 3027107 | 0,0030 | 1,59  |
| 205301_S_AT | OGG1    | 2878919 | 0,0034 | -1,23 |
| 219475_AT   | OKL38   | 2876062 | 0,0243 | -1,24 |
| 219032_X_AT | OPN3    | 3029000 | 0,0035 | 1,61  |
| 219912_S_AT | OR2A4   | 2878049 | 0,0025 | -1,22 |
| 218556_AT   | ORMDL2  | 3028450 | 0,0206 | 1,33  |
| 219073_S_AT | OSBPL10 | 2873060 | 0,0227 | 1,55  |
| 212585_AT   | OSBPL8  | 2866648 | 0,0138 | 1,37  |
| 208877_AT   | PAK2    | 2874077 | 0,0233 | 1,26  |
| 203060_S_AT | PAPSS2  | 3025545 | 0,0166 | 1,76  |
| 213372_AT   | PAQR3   | 2863840 | 0,0008 | 1,44  |
| 211867_S_AT | PCDHA10 | 2872214 | 0,0010 | -1,23 |
| 219295_S_AT | PCOLCE2 | 2870321 | 0,0066 | 1,37  |
| 211840_S_AT | PDE4D   | 2875195 | 0,0148 | -1,26 |
| 214129_AT   | PDE4DIP | 2874114 | 0,0207 | 1,48  |
| 204091_AT   | PDE6D   | 2860167 | 0,0035 | 1,27  |
| 214174_S_AT | PDLIM4  | 3026942 | 0,0181 | -1,37 |
| 220555_S_AT | PDZD7   | 3027772 | 0,0199 | -1,20 |

|             |           |         |        |       |
|-------------|-----------|---------|--------|-------|
| 205361_S_AT | PFDN4     | 2862445 | 0,0026 | 1,40  |
| 210041_S_AT | PGM3      | 2863838 | 0,0210 | 1,33  |
| 40446_AT    | PHF1      | 2866842 | 0,0034 | -1,24 |
| 221611_S_AT | PHF7      | 2870392 | 0,0132 | -1,28 |
| 213651_AT   | PIB5PA    | 3024825 | 0,0037 | -1,92 |
| 205281_S_AT | PIGA      | 2860565 | 0,0233 | 1,49  |
| 205078_AT   | PIGF      | 3028680 | 0,0068 | 1,20  |
| 208277_AT   | PITX3     | 2923155 | 0,0185 | -1,26 |
| 219014_AT   | PLAC8     | 2876002 | 0,0089 | 2,10  |
| 214212_X_AT | PLEKHC1   | 2862978 | 0,0163 | -1,28 |
| 201939_AT   | PLK2      | 2871503 | 0,0061 | 1,71  |
| 209740_S_AT | PNPLA4    | 3027327 | 0,0191 | -1,22 |
| 202634_AT   | POLR2K    | 2862622 | 0,0026 | 1,39  |
| 202635_S_AT | POLR2K    | 2862622 | 0,0239 | 1,26  |
| 208286_X_AT | POU5F1P1  | 2892363 | 0,0053 | -1,21 |
| 208286_X_AT | POU5F1P1  | 2879759 | 0,0053 | -1,21 |
| 208286_X_AT | POU5F1P1  | 2870181 | 0,0053 | -1,21 |
| 205938_AT   | PPM1E     | 2890157 | 0,0113 | -1,25 |
| 201604_S_AT | PPP1R12A  | 3026575 | 0,0153 | 1,29  |
| 204507_S_AT | PPP3R1    | 2867869 | 0,0141 | 1,39  |
| 201923_AT   | PRDX4     | 2865396 | 0,0099 | 1,35  |
| 205272_S_AT | PRH1      | 3029078 | 0,0151 | -1,31 |
| 205272_S_AT | PRH1      | 2878722 | 0,0151 | -1,31 |
| 210543_S_AT | PRKDC     | 2861049 | 0,0184 | 1,34  |
| 221547_AT   | PRPF18    | 2865250 | 0,0156 | 1,25  |
| 220553_S_AT | PRPF39    | 3028703 | 0,0094 | 1,38  |
| 202126_AT   | PRPF4B    | 2864994 | 0,0111 | 1,27  |
| 220024_S_AT | PRX       | 3025976 | 0,0026 | -1,20 |
| 203460_S_AT | PSEN1     | 2873661 | 0,0012 | 1,30  |
| 201317_S_AT | PSMA2     | 2870593 | 0,0239 | 1,23  |
| 202352_S_AT | PSMD12    | 2878133 | 0,0030 | 1,24  |
| 202353_S_AT | PSMD12    | 2878133 | 0,0150 | 1,30  |
| 211837_S_AT | PTCRA     | 2875906 | 0,0202 | -1,31 |
| 211711_S_AT | PTEN      | 2869795 | 0,0071 | 1,55  |
| 204053_X_AT | PTEN      | 2869795 | 0,0157 | 1,36  |
| 213691_AT   | PTOV1     | 3028485 | 0,0075 | -1,29 |
| 213691_AT   | PTOV1     | 2993630 | 0,0075 | -1,29 |
| 200730_S_AT | PTP4A1    | 2867357 | 0,0232 | 1,46  |
| 214223_AT   | PTP4A3    | 2870942 | 0,0097 | -1,25 |
| 202006_AT   | PTPN12    | 2874017 | 0,0011 | 1,34  |
| 205846_AT   | PTPRB     | 2871497 | 0,0111 | -1,39 |
| 215740_AT   | PTPRN2    | 2933086 | 0,0061 | -1,21 |
| 213806_AT   | PURA      | 2876363 | 0,0113 | -1,22 |
| 216240_AT   | PVT1      | 2922155 | 0,0109 | -1,21 |
| 216240_AT   | PVT1      | 2878361 | 0,0109 | -1,21 |
| 201606_S_AT | PWP1      | 2859037 | 0,0161 | -1,20 |
| 202990_AT   | PYGL      | 2858332 | 0,0126 | 1,45  |
| 212262_AT   | QKI       | 3024440 | 0,0098 | 1,37  |
| 219681_S_AT | RAB11FIP1 | 2870660 | 0,0146 | 2,25  |
| 216043_X_AT | RAB11FIP3 | 3028728 | 0,0232 | -1,21 |
| 218360_AT   | RAB22A    | 2858423 | 0,0235 | 1,32  |
| 217597_X_AT | RAB40B    | 3025496 | 0,0211 | -1,39 |
| 211960_S_AT | RAB7      | 2878299 | 0,0178 | 1,34  |
| 218310_AT   | RABGEF1   | 2867563 | 0,0121 | 1,24  |

|             |              |         |        |       |
|-------------|--------------|---------|--------|-------|
| 222077_S_AT | RACGAP1      | 2875708 | 0,0171 | 1,49  |
| 209849_S_AT | RAD51C       | 2873267 | 0,0111 | 1,20  |
| 211953_S_AT | RANBP5       | 3028158 | 0,0011 | 1,57  |
| 202362_AT   | RAP1A        | 2863593 | 0,0095 | 1,39  |
| 200833_S_AT | RAP1B        | 2865899 | 0,0047 | 1,23  |
| 218657_AT   | RAPGEFL1     | 3029125 | 0,0174 | -1,21 |
| 221872_AT   | RARRES1      | 2870035 | 0,0027 | 2,35  |
| 206392_S_AT | RARRES1      | 2870035 | 0,0030 | 2,06  |
| 210371_S_AT | RBBP4        | 2859599 | 0,0012 | 1,41  |
| 212168_AT   | RBM12        | 2868198 | 0,0002 | 1,49  |
| 221309_AT   | RBM17        | 2865597 | 0,0216 | -1,25 |
| 208319_S_AT | RBM3         | 2875821 | 0,0094 | 1,63  |
| 215127_S_AT | RBMS1        | 2872025 | 0,0194 | 1,29  |
| 206499_S_AT | RCC1         | 2870776 | 0,0124 | 1,29  |
| 212918_AT   | RECQL        | 3026395 | 0,0017 | 1,43  |
| 205091_X_AT | RECQL        | 3026395 | 0,0230 | 1,24  |
| 200938_S_AT | RERE         | 2860479 | 0,0015 | -1,27 |
| 201452_AT   | RHEB         | 2887014 | 0,0198 | -1,34 |
| 213397_X_AT | RNASE4       | 2875747 | 0,0073 | 1,96  |
| 205158_AT   | RNASE4       | 2875747 | 0,0080 | 1,70  |
| 220096_AT   | RNASET2      | 2864300 | 0,0221 | -1,24 |
| 214697_S_AT | ROD1         | 2873180 | 0,0102 | 1,35  |
| 206419_AT   | RORC         | 2860903 | 0,0105 | -1,31 |
| 205191_AT   | RP2          | 2876872 | 0,0054 | 1,35  |
| 221171_AT   | RP4-692D3.1  | 2862083 | 0,0188 | -1,24 |
| 218551_AT   | RP5-1077B9.4 | 2865133 | 0,0239 | -1,22 |
| 215208_X_AT | RPL35A       | 3028226 | 0,0210 | -1,44 |
| 219370_AT   | RPRM         | 2873401 | 0,0030 | -1,26 |
| 203843_AT   | RPS6KA3      | 3026188 | 0,0211 | 1,27  |
| 201980_S_AT | RSU1         | 2940143 | 0,0035 | 1,43  |
| 211509_S_AT | RTN4         | 3027271 | 0,0213 | 1,25  |
| 213066_AT   | RUSC2        | 2872839 | 0,0232 | -1,22 |
| 36129_AT    | RUTBC1       | 2866952 | 0,0089 | -1,22 |
| 202917_S_AT | S100A8       | 2864870 | 0,0038 | 3,50  |
| 220330_S_AT | SAMSN1       | 2859092 | 0,0171 | 2,61  |
| 218854_AT   | SART2        | 2858274 | 0,0236 | 1,57  |
| 216899_S_AT | SCAP2        | 2864651 | 0,0188 | 1,38  |
| 215026_X_AT | SCNN1A       | 2869193 | 0,0054 | -1,23 |
| 217264_S_AT | SCNN1A       | 2869193 | 0,0160 | -1,29 |
| 205475_AT   | SCRG1        | 2876586 | 0,0132 | 1,20  |
| 209206_AT   | SEC22L1      | 2878470 | 0,0085 | 1,43  |
| 214257_S_AT | SEC22L1      | 2878470 | 0,0146 | 1,26  |
| 212887_AT   | SEC23A       | 2860516 | 0,0043 | 1,79  |
| 204344_S_AT | SEC23A       | 2860516 | 0,0067 | 1,36  |
| 210293_S_AT | SEC23B       | 2858428 | 0,0021 | 1,38  |
| 209175_AT   | SEC23IP      | 2870373 | 0,0054 | 1,36  |
| 212900_AT   | SEC24A       | 2877248 | 0,0139 | 1,40  |
| 202375_AT   | SEC24D       | 2859990 | 0,0008 | 1,71  |
| 203789_S_AT | SEMA3C       | 2860908 | 0,0121 | 2,61  |
| 220490_AT   | SERINC2      | 3015652 | 0,0239 | -1,21 |
| 220490_AT   | SERINC2      | 2873959 | 0,0239 | -1,21 |
| 220626_AT   | SERPINA10    | 2862981 | 0,0127 | -1,21 |
| 201586_S_AT | SFPQ         | 3028078 | 0,0020 | 1,34  |
| 201585_S_AT | SFPQ         | 3028078 | 0,0193 | 1,20  |

|             |          |         |        |       |
|-------------|----------|---------|--------|-------|
| 202060_AT   | SH2BP1   | 2870210 | 0,0193 | 1,38  |
| 201312_S_AT | SH3BGRL  | 2877545 | 0,0051 | 1,31  |
| 213464_AT   | SHC2     | 3026850 | 0,0082 | -1,32 |
| 217283_AT   | SHOX2    | 2865455 | 0,0225 | -1,23 |
| 208157_AT   | SIM2     | 2872052 | 0,0043 | -1,25 |
| 218878_S_AT | SIRT1    | 2860039 | 0,0128 | 1,35  |
| 209401_S_AT | SLC12A4  | 2877003 | 0,0122 | -1,27 |
| 204229_AT   | SLC17A7  | 2877761 | 0,0078 | -1,20 |
| 210343_S_AT | SLC22A6  | 2873540 | 0,0230 | -1,25 |
| 221662_S_AT | SLC22A7  | 2871016 | 0,0109 | -1,30 |
| 221020_S_AT | SLC25A32 | 3028869 | 0,0171 | 1,41  |
| 220733_AT   | SLC26A1  | 2978150 | 0,0164 | -1,26 |
| 207560_AT   | SLC28A1  | 3023683 | 0,0124 | -1,23 |
| 204204_AT   | SLC31A2  | 2860689 | 0,0126 | 1,60  |
| 203306_S_AT | SLC35A1  | 2859258 | 0,0156 | 1,28  |
| 220924_S_AT | SLC38A2  | 2871776 | 0,0089 | 1,33  |
| 218041_X_AT | SLC38A2  | 2871776 | 0,0113 | 1,31  |
| 214830_AT   | SLC38A6  | 2868636 | 0,0134 | 1,43  |
| 215401_AT   | SLC7A1   | 2866608 | 0,0113 | -1,20 |
| 206875_S_AT | SLK      | 2865011 | 0,0232 | 1,37  |
| 217758_S_AT | SMBP     | 2966529 | 0,0050 | 1,27  |
| 201589_AT   | SMC1L1   | 2878210 | 0,0054 | 1,44  |
| 201664_AT   | SMC4L1   | 2879333 | 0,0121 | 1,41  |
| 200071_AT   | SMNDC1   | 2869676 | 0,0078 | 1,31  |
| 205104_AT   | SNPH     | 3028190 | 0,0106 | -1,27 |
| 206055_S_AT | SNRPA1   | 2876114 | 0,0128 | 1,30  |
| 202690_S_AT | SNRPD1   | 2865008 | 0,0035 | 1,32  |
| 221561_AT   | SOAT1    | 3029454 | 0,0017 | 1,56  |
| 216841_S_AT | SOD2     | 2864556 | 0,0006 | 1,61  |
| 201417_AT   | SOX4     | 3024488 | 0,0159 | 1,55  |
| 206815_AT   | SPAG8    | 2873712 | 0,0151 | -1,31 |
| 218324_S_AT | SPATS2   | 2872924 | 0,0174 | 1,44  |
| 209875_S_AT | SPP1     | 2859213 | 0,0080 | 3,03  |
| 216202_S_AT | SPTLC2   | 3025318 | 0,0152 | 1,41  |
| 209218_AT   | SQLE     | 3023905 | 0,0015 | 1,62  |
| 203605_AT   | SRP54    | 2862653 | 0,0150 | 1,39  |
| 208802_AT   | SRP72    | 2872476 | 0,0118 | 1,31  |
| 202200_S_AT | SRPK1    | 2865239 | 0,0166 | 1,36  |
| 203182_S_AT | SRPK2    | 2881455 | 0,0177 | 1,22  |
| 216465_AT   | SRPX2    | 2875890 | 0,0192 | -1,21 |
| 201894_S_AT | SSR1     | 3025535 | 0,0053 | 1,30  |
| 202293_AT   | STAG1    | 2875066 | 0,0033 | 1,28  |
| 204548_AT   | STAR     | 2863670 | 0,0107 | -1,20 |
| 212572_AT   | STK38L   | 2871217 | 0,0084 | 1,29  |
| 212631_AT   | STX7     | 2878285 | 0,0227 | 1,24  |
| 202829_S_AT | SYBL1    | 2871147 | 0,0110 | 1,25  |
| 216182_AT   | SYNJ2    | 2865106 | 0,0007 | -1,25 |
| 215272_AT   | TADA3L   | 3029356 | 0,0081 | -1,27 |
| 206283_S_AT | TAL1     | 2878477 | 0,0092 | -1,27 |
| 221456_AT   | TAS2R3   | 2874450 | 0,0179 | -1,28 |
| 212956_AT   | TBC1D9   | 2873071 | 0,0098 | 1,60  |
| 216645_AT   | TCF3     | 2873202 | 0,0113 | -1,28 |
| 212758_S_AT | TCF8     | 2867361 | 0,0057 | -1,40 |
| 221866_AT   | TFEB     | 2863902 | 0,0074 | -1,28 |

|             |          |         |        |       |
|-------------|----------|---------|--------|-------|
| 205210_AT   | TGFBRAP1 | 2876843 | 0,0067 | -1,27 |
| 217658_AT   | THAP3    | 3028890 | 0,0155 | -1,40 |
| 218492_S_AT | THAP7    | 3030013 | 0,0052 | -1,23 |
| 201110_S_AT | THBS1    | 3025039 | 0,0156 | 2,60  |
| 204872_AT   | TLE4     | 3029164 | 0,0140 | 1,76  |
| 221379_AT   | TLX1     | 2866407 | 0,0243 | -1,20 |
| 218113_AT   | TMEM2    | 3030003 | 0,0204 | 1,46  |
| 220691_AT   | TMEM23   | 2964389 | 0,0210 | -1,24 |
| 217743_S_AT | TMEM30A  | 2873321 | 0,0010 | 1,41  |
| 219410_AT   | TMEM45A  | 2877309 | 0,0143 | 1,78  |
| 213024_AT   | TMF1     | 2860504 | 0,0034 | 1,41  |
| 202510_S_AT | TNFAIP2  | 3024849 | 0,0243 | 1,50  |
| 214581_X_AT | TNFRSF21 | 2858986 | 0,0220 | 1,89  |
| 215844_AT   | TNPO2    | 2877181 | 0,0011 | -1,29 |
| 215045_AT   | TNRC4    | 2859211 | 0,0186 | -1,23 |
| 217413_S_AT | TNXB     | 2876292 | 0,0229 | -1,30 |
| 218095_S_AT | TPARL    | 2860192 | 0,0055 | 1,32  |
| 220339_S_AT | TPSG1    | 2873237 | 0,0097 | -1,23 |
| 205598_AT   | TRAIP    | 3025329 | 0,0118 | -1,20 |
| 210177_AT   | TRIM15   | 2871496 | 0,0164 | -1,25 |
| 204390_AT   | TRIM24   | 3027066 | 0,0011 | -1,23 |
| 209109_S_AT | TSPAN6   | 2867948 | 0,0051 | 1,43  |
| 209108_AT   | TSPAN6   | 2867948 | 0,0228 | 1,27  |
| 221493_AT   | TSPYL1   | 2864600 | 0,0236 | 1,39  |
| 204141_AT   | TUBB2A   | 3015580 | 0,0071 | 2,37  |
| 206705_AT   | TULP1    | 2869943 | 0,0239 | -1,24 |
| 208864_S_AT | TXN      | 3011795 | 0,0024 | 1,34  |
| 209476_AT   | TXNDC    | 2874899 | 0,0030 | 1,28  |
| 211432_S_AT | TYRO3    | 2876997 | 0,0229 | -1,20 |
| 211764_S_AT | UBE2D1   | 2861953 | 0,0225 | 1,23  |
| 217826_S_AT | UBE2J1   | 2864932 | 0,0152 | 1,42  |
| 212751_AT   | UBE2N    | 2870099 | 0,0072 | 1,34  |
| 216584_AT   | UBIAD1   | 3023980 | 0,0242 | -1,30 |
| 203343_AT   | UGDH     | 2871390 | 0,0086 | 1,51  |
| 206094_X_AT | UGT1A6   | 2876232 | 0,0158 | -1,21 |
| 220862_S_AT | USP22    | 2873033 | 0,0190 | -1,29 |
| 203992_S_AT | UTX      | 2873231 | 0,0204 | 1,40  |
| 205946_AT   | VIPR2    | 3025109 | 0,0202 | -1,24 |
| 204377_S_AT | VPRBP    | 2867245 | 0,0165 | -1,20 |
| 220221_AT   | VPS13D   | 3027842 | 0,0130 | -1,26 |
| 215276_AT   | WFDC8    | 2874175 | 0,0223 | -1,28 |
| 222367_AT   | WHDC1L2  | 3030018 | 0,0208 | -1,20 |
| 222367_AT   | WHDC1L2  | 2872139 | 0,0208 | -1,20 |
| 222367_AT   | WHDC1L2  | 2861705 | 0,0208 | -1,20 |
| 221784_AT   | WIZ      | 3026626 | 0,0068 | -1,24 |
| 208642_S_AT | XRCC5    | 2859035 | 0,0154 | 1,21  |
| 201351_S_AT | YME1L1   | 2878343 | 0,0015 | 1,27  |
| 217812_AT   | YTHDF2   | 2860732 | 0,0083 | 1,22  |
| 221749_AT   | YTHDF3   | 2872133 | 0,0174 | 1,44  |
| 200638_S_AT | YWHAZ    | 3024647 | 0,0039 | 1,56  |
| 200641_S_AT | YWHAZ    | 3024647 | 0,0216 | 1,43  |
| 200640_AT   | YWHAZ    | 3024647 | 0,0233 | 1,29  |
| 213376_AT   | ZBTB1    | 2872028 | 0,0176 | 1,29  |
| 213299_AT   | ZBTB7A   | 2864905 | 0,0082 | -1,23 |

|             |        |         |        |       |
|-------------|--------|---------|--------|-------|
| 202979_S_AT | ZF     | 2877947 | 0,0079 | 1,32  |
| 202049_S_AT | ZMYM4  | 3027244 | 0,0094 | 1,29  |
| 213452_AT   | ZNF184 | 3024852 | 0,0038 | 1,36  |
| 206416_AT   | ZNF205 | 3027641 | 0,0039 | -1,38 |
| 203739_AT   | ZNF217 | 2870586 | 0,0155 | 1,65  |
| 219540_AT   | ZNF267 | 3028364 | 0,0015 | 1,66  |
| 206403_AT   | ZNF536 | 2858022 | 0,0138 | -1,31 |
| 221844_X_AT | ZNF574 | 3025324 | 0,0208 | 1,30  |
| 205739_X_AT | ZNF588 | 2858092 | 0,0067 | 1,36  |
